# Supplementary material for: Elevated prelimbic cortex-to-basolateral amygdala circuit activity mediates comorbid anxiety-like behaviors associated with chronic pain
Source: JCI journal article supplement (doi:10.1172/jci166356), 2023-03-14
Supplement: sd1 [file 1]

301 Moved Permanently

# Moved Permanently

The document has moved here.
