# Supplementary material for: Elevated prelimbic cortex-to-basolateral amygdala circuit activity mediates comorbid anxiety-like behaviors associated with chronic pain
Source: JCI journal article supplement (doi:10.1172/jci166356), 2023-03-14
Supplement: sd1 [file 1]

|   |                                     |           |
|---|-------------------------------------|-----------|
| 1 | <b>Supplemental Materials</b>       |           |
| 2 |                                     |           |
| 3 | • <b>Methods</b> .....              | <b>2</b>  |
| 4 | • <b>References</b> .....           | <b>21</b> |
| 5 | • <b>Supplemental Figures</b> ..... | <b>22</b> |
| 6 | • <b>Statistical results</b> .....  | <b>43</b> |

1 **Methods**

2 **Animals**

3 Eight- to ten-week-old male and female mice were used for experiments.  
4 C57BL/6J mice were purchased from Guangdong Medical Laboratory Animal  
5 Center. *Tnfa* KO mice (stock#: 005540) and *Il6* KO mice (stock#: 002650) were  
6 purchased from Jackson Laboratory. The following primers were used for  
7 genotyping: *Tnfa* KO: 5'-TAG CCA GGA GGG AGA ACA GA-3', 5'-AGT GCC  
8 TCT TCT GCC AGT TC-3' and 5'-CGT TGG CTA CCC GTG ATA TT-3'; *IL-6* KO,  
9 5'-TTC CAT CCA GTT GCC TTC TTG G-3', 5'-AGT GCC TCT TCT GCC AGT  
10 TC-3' and 5'-CCG GAG AAC CTG CGT GCA ATC C-3'. Mice had access to food  
11 and water ad libitum and were housed under the condition of 12 hr light/dark  
12 cycle (light on at 6 am) with a temperature of 22 ± 1°C and > 30% humidity.  
13 Animal experiments were carried out following the Guidelines for Animal Care  
14 and Use of China. The animal experimental protocols were approved by the  
15 Animal Ethics Committee of Guangzhou Medical University.

16

17 **Reagents and antibodies**

18 Chemicals were purchased from Sigma-Aldrich unless otherwise indicated. 6-  
19 cyano-7-nitroquinoxaline-2,3-dione (CNQX, 0190), DL-2-amino-5-  
20 phosphonopentanoic acid (DL-AP5, 0105), and SR-95531 (1262) were  
21 purchased from Tocris Bioscience. Recombinant TNF- $\alpha$  protein was procured  
22 from R&D system (#210-TA-020/CF), and Etanercept (EN) was obtained from  
23 Pfizer. Following antibodies were used in the present study: rabbit anti-CaMKII $\alpha$

1 (Abcam, ab5683, 1:250 for immunofluorescent staining); rabbit anti-GluA1 (Cell  
2 Signaling Technology, #13185, 1:1000 for immunoblotting); rabbit anti-GluA2  
3 (Cell Signaling Technology, #13607, 1:1000 for immunoblotting); rabbit anti-  
4 GluN1 (Cell Signaling Technology, #5704S, 1:1000 for immunoblotting); rabbit  
5 anti-GluN2A (Cell Signaling Technology, #4205S, 1:1000 for immunoblotting);  
6 rabbit anti-GluN2B (Cell Signaling Technology, #14544, 1:1000 for  
7 immunoblotting); mouse anti-TNFR1 (Santa Cruz Biotechnology, sc-8436, 1:500  
8 for immunoblotting); mouse anti- $\beta$ -actin (Sigma-Aldrich, A1978, 1:8000 for  
9 immunoblotting); mouse anti-GAPDH (Proteintech, 60004-1, 1:10000 for  
10 immunoblotting).

11

## 12 **Chronic pain mouse model**

13 A neuropathic pain mouse model, as described previously, was utilized as a  
14 chronic pain model (1). In brief, mice were anesthetized via inhalation of  
15 isoflurane (2-3%). A 1 cm-long incision was made on the skin and muscle of the  
16 left thigh, followed by blunt dissection until the three terminal branches of the  
17 sciatic nerve (the sural, common peroneal, and tibial nerves) were exposed.  
18 Common peroneal and tibial nerves were ligated with 4/0 chromic gut sutures.  
19 Approximately 2 mm of fractions were cut off below the suture of nerves while the  
20 sural nerve was kept intact. The incision was then sutured with surgical knots  
21 and erythromycin ointment was applied. Mice in the sham group had the same  
22 surgical procedure except nerve ligation.

23

1 **Chronic restraint stress model**

2 The chronic restraint stress model was generated as described previously (2).  
3 Briefly, adult male mice were placed in plastic tubes with holes for airflow for 2 h  
4 (1 pm–3 pm) per day for 10 consecutive days. The control mice were placed in  
5 the test room for 2h without restraint, and then returned to their home cages. The  
6 anxiety-like behaviors of these mice were examined on the day after the last  
7 training day.

8

9 **Behavioral tests**

10 All behavioral tests were performed during the light phase (1 pm–5 pm). Mice  
11 were kept in the testing room (dim light: ~60 lux) for habituation for at least 1hr  
12 before the test. The mice's behaviors were monitored using an overhead camera  
13 and tracking software (EthoVision XT, Noldus). Areas were cleaned with 75%  
14 ethanol to get rid of olfactory disturbance between tests. The details of behavioral  
15 tests are as follows:

16 **Mechanical pain threshold test:** Von Frey test was utilized to detect the  
17 mechanical pain threshold (3). Briefly, mice were placed in a plastic cylinder on  
18 an elevated wire mesh table for 30 min for acclimatization. A set of von Frey  
19 filaments (0.008-4 g, Stoelting, IL, USA) was used to test the mechanical  
20 withdrawal threshold of hindpaws (ipsilateral to the operation). During the test, a  
21 single filament was perpendicularly pressed against the lateral plantar surface of  
22 hindpaws in ascending order of strength. The gauge of filament was recorded as



1 the mechanical pain threshold when mice showed nociceptive behaviors such as  
2 sudden paw withdrawal, flinching, or paw licking in three out of five stimuli.

3 **Open field test:** The mouse was gently placed in the center of an open  
4 field apparatus (40 × 40 × 40 cm) and was allowed to explore the arena for 5 min.  
5 The total distance was analyzed as a measure of locomotor ability, and the time  
6 spent in the center of the arena (20 × 20 cm) was processed as an evaluation of  
7 the anxiety-like behavior.

8 **Elevated plus-maze test:** As described previously (4), an elevated plus-  
9 maze which consists of two opposing wall-closed arms (30 × 5 × 15 cm), two  
10 opposing open arms (30 × 5 × 0.5 cm), and a center platform (5 × 5 cm) was  
11 used to create an approach-avoidance conflict environment. Each mouse was  
12 rapidly put into the central platform facing an open arm, and movements were  
13 recorded in a 5-min session. The time spent in the open arms and the ratio of  
14 open-arm entries to total arm entries were analyzed to assess the general  
15 anxiety level.

16

### 17 **Virus injection, drug delivery, and fiberoptic cannula implantation**

18 As described previously (5), mice were anesthetized with isoflurane (2 - 3%) and  
19 head-fixed in a stereotaxic device (RWD Life Science. Inc, China). An incision  
20 was made through the scalp to expose the skull for drilling. For virus injection, a  
21 specific volume of the virus was injected into the BLA (coordinates from bregma:  
22 AP, -1.20 mm; DV, -4.75 mm; ML, ±3.20 mm), I/vIPAG (coordinates from bregma:  
23 AP, -4.85 mm; DV, -3.00 mm; ML, ±0.35 mm) or PrL (coordinates from bregma:

1 AP, +2.20 mm; DV, -1.90 mm; ML,  $\pm 0.30$  mm) through a pulled glass capillary,  
2 controlled by a microinjector (Nanoliter 2020, World Precision Instruments) at a  
3 rate of 20 nl/min. The capillary was retracted slowly 10 min after the injection.  
4 Incision site was sutured and covered with erythromycin ointment. Mice were  
5 then returned to their home cages for recovery.

6 The following AAV vectors were used in the present study: AAV2/R-  
7 CaMKII $\alpha$ -eGFP (titer:  $5.24 \times 10^{12}$  v.g./ml, 0.1  $\mu$ l unilateral or bilateral into BLA,  
8 BrainVTA); AAV2/R-CaMKII $\alpha$ -mCherry (titer:  $5.00 \times 10^{12}$  v.g./ml, 0.2  $\mu$ l unilateral  
9 into I/vIPAG, BrainVTA); AAV2/R-CaMKII $\alpha$ -GCaMP6s (titre:  $5.06 \times 10^{12}$  v.g./ml,  
10 0.2  $\mu$ l unilateral into BLA or I/vIPAG, BrainVTA); AAV2/9-CaMKII $\alpha$ -Chr2-  
11 mCherry (titer:  $3.74 \times 10^{12}$  v.g./ml, 0.2  $\mu$ l bilateral into PrL, BrainVTA); AAV2/9-  
12 CaMKII $\alpha$ -eNpHR-mCherry (titer:  $2.93 \times 10^{12}$  v.g./ml, 0.2  $\mu$ l bilateral into PrL,  
13 BrainVTA); AAV2/9-CaMKII $\alpha$ -mCherry (titer:  $5.14 \times 10^{12}$  v.g./ml, 0.2  $\mu$ l bilateral  
14 into PrL, BrainVTA); AAV2/9-CaMKII $\alpha$ -Cre (titer:  $5.85 \times 10^{12}$  v.g./ml, 0.2  $\mu$ l  
15 bilateral into BLA, BrainVTA); AAV2/9-CMV-DIO-GluA1-ct-eGFP (titer:  $2.22 \times$   
16  $10^{13}$  v.g./ml, 0.2  $\mu$ l bilateral into PrL); AAV2/9-CMV-DIO-eGFP (titer:  $9.16 \times 10^{12}$   
17 v.g./ml, 0.2  $\mu$ l bilateral into PrL); AAV2/9-CMV-DIO-*Tnfr1*-shRNA-eGFP (titer:  
18  $5.18 \times 10^{12}$  v.g./ml, 0.2  $\mu$ l bilateral into PrL); AAV2/9-CMV-DIO-scrambled  
19 shRNA-eGFP (titer:  $2.68 \times 10^{12}$  v.g./ml, 0.2  $\mu$ l bilateral into PrL). The sequence of  
20 *Tnfr1* shRNA: 5'-CCT CGT GCT TTC CAA GAT GAA-3'; Scrambled *shRNA*: 5'-  
21 GTT CTC CGA ACG TGT CAC GTA-3'. All viral vectors were aliquoted and  
22 stored at -80 °C until use.

1 For cannula implantation, the guide cannula (ID: 0.38 mm; RWD Life  
2 Science) together with a dummy cannula was unilaterally implanted inside the  
3 right PrL with the same coordination site as virus injection and cemented onto the  
4 skull with dental cement. Mice were then returned to their home cages and  
5 allowed to recover for at least 7 days before experiments. On the injection day,  
6 TNF- $\alpha$  was freshly prepared in O<sub>2</sub>-saturated artificial cerebrospinal fluid (ACSF)  
7 at 5 ng/ $\mu$ l. TNF- $\alpha$  (1  $\mu$ l), EN (1  $\mu$ l, 50  $\mu$ g/ $\mu$ l), or ACSF with the same volume was  
8 infused through an internal cannula (ID: 0.2 mm, RWD Life Science) controlled  
9 with the same microinjector at a rate of 0.1  $\mu$ l/min. The capillary was slowly  
10 retracted 10 min after the injection.

11 For fiberoptic cannula implantation, the ceramic ferrule (diameter: 2.5 mm)  
12 with optic fiber (core diameter: 200  $\mu$ m; NA: 0.37; length: 5 mm for the BLA and  
13 3.5 mm for the I/VPAG; Inper, China) was implanted bilaterally into the BLA (AP,  
14 -1.20 mm; DV, -4.55 mm; ML,  $\pm$ 3.20 mm) or unilaterally into the right I/VPAG (AP,  
15 -4.85 mm; DV, -2.80 mm; ML, -0.35 mm).

16

### 17 **Verification of injection site and immunostaining**

18 Anesthetized mice were transcardially perfused with 0.9% saline followed by 4%  
19 paraformaldehyde (PFA) in 0.1 M phosphate-buffered saline (PBS). The brain  
20 was collected and fixed in a 4% PFA solution for at least 6 hr prior to transferring  
21 into 30% sucrose for dehydration. Brain blocks were then frozen in OCT at -  
22 80 °C freezer and sectioned into 30- $\mu$ m-thick slices using a cryostat (CM1950,  
23 Leica). For injection site verification, slices were mounted with Vectashield

1 mounting medium (Vector lab), and images were captured using a confocal  
2 microscope (A1R, Nikon). For immunostaining, brain slices were permeabilized  
3 and blocked in 0.3% Triton X-100 and 5% BSA for 30 min, and incubated with  
4 primary antibodies at 4 °C overnight. After washing with PBS three times (10 min  
5 each), slices were incubated with Alexa Fluor-conjugated secondary antibodies  
6 (1:800, Jackson ImmunoResearch) for 1 h at room temperature, washed again,  
7 and mounted with Vectashield mounting medium (Vector lab). Images were  
8 captured using a confocal microscope (A1R, Nikon).

9

#### 10 **Microprism implant assembly and implantation**

11 The microprism assemblies were constructed under a binocular microscope, in  
12 which a right-angle microprism (BK7 glass, 1.5 mm side length, Tower Optical)  
13 with an aluminum coating on hypotenuse was bonded to the center of a circular  
14 coverslip (Diameter: 3.5 mm; Thickness: 0.15 mm) using a UV-curing optical  
15 adhesive (Norland #81). Components were positioned in place with the help of  
16 vacuum clamping.

17 The microprism implantation was performed as described previously (6, 7).  
18 Briefly, anesthetized mice were head-fixed in a stereotaxic device (RWD Life  
19 Science. Inc, China). a ~4 mm circular craniotomy (coordinates of the center from  
20 bregma: AP, 1.8 mm; ML, 0.75 mm) was performed and the dura over the  
21 contralateral hemisphere of virus-injection site was gently removed with fine  
22 forceps. Great care was taken to minimize bleeding as diploic and emissary  
23 veins are prominent in the frontal region. Whenever possible, saline-soaked

1 surgical gelatin sponge was used to stop bleeding. The microprism assembly  
2 was positioned using vacuum, applied by a nozzle held in the stereotaxic frame.  
3 The front face and lower edge of the microprism were aligned parallel to the  
4 longitudinal fissure and the dorsal surface of the brain, respectively. The  
5 microprism was slowly lowered into the subdural space and did not stop until the  
6 coverslip slightly compressed the dorsal cortical surface, to minimize brain  
7 motion during the test. Veterinary adhesive (Vetbond, Fisher Scientific) was used  
8 to seal the gap between the implant and the skull. After retracting vacuum  
9 clamping, a custom-made circular titanium headplate was attached to the skull  
10 using dental cement (C&B Metabond, Parkell). The scalp incision was sutured  
11 and covered with erythromycin ointment.

12

### 13 **In-vivo two-photon Ca<sup>2+</sup> imaging and analysis**

14 Mice were placed under the objective by screwing the titanium head plate into a  
15 custom-built fork fixed to a solid metal base. All mice were trained to habituate  
16 this process for at least 1 week before the real experiment. Vascular landmarks  
17 and contours of the prism were first identified to relocate recording sites. During  
18 Ca<sup>2+</sup> imaging, the laser was tuned to 920 nm, with the power restricted below 20  
19 mW. Ca<sup>2+</sup> images were acquired using a two-photon laser-scanning microscope  
20 (A1R, Nikon) with a water-immersed objective (40X, 0.8 NA, 3.5 mm working  
21 distance). Time-lapse Ca<sup>2+</sup> images with a resolution of 512 x 512 pixels were  
22 recorded in the PrL at 1 Hz for 5 min. If the substantial movement of mice was  
23 observed during image acquisition, the second set of images was obtained. In

1 the experiments detecting  $\text{Ca}^{2+}$  activities in response to anxiogenic stimuli, a 15  
2 ml-EP tube containing a cotton ball soaked with fox urine (Trap Shack company,  
3 USA) was rapidly placed  $\sim 1$  cm away from the mice nostril for 1 s, or a foot  
4 shock (0.5 mA, 1s) generated by a customized electric shock module was given  
5 to the hindpaw of mice. Each type of stimuli was randomly given 10 times, with  
6 an interval of 1 min.

7 For analysis of neuronal  $\text{Ca}^{2+}$  activity, the motion correction was first  
8 performed with a toolbox of EZ calcium-2.1.2 in MATLAB, followed by  
9 quantification of somatic calcium dynamics by ImageJ software (NIH) according  
10 to previous studies (8, 9). The fluorescent value ( $F$ ) was obtained by averaging  
11 the intensities of pixels within the region of interest at each time point.  
12 Fluorescence dynamics  $\Delta F/F_0$  was calculated as  $(F - F_0)/F_0$ , where the  $F_0$  was the  
13 average of 10% minimum  $F$  value (baseline fluorescence) over 5 min.  
14 Background fluorescence was subtracted from all the  $F$  values. The integrated  
15  $\text{Ca}^{2+}$  activity was calculated by summation of all  $\Delta F/F_0$ , which are above three  
16 times the standard deviation (SD) of baseline fluorescence. A spontaneous  $\text{Ca}^{2+}$   
17 transient was identified as  $(\Delta F/F_0)_{n-1} < (\Delta F/F_0)_n > (\Delta F/F_0)_{n+1}$  ( $\Delta F/F_0 \geq 3 \times \text{SD}$ ). In  
18 the experiment determining the responsive neurons to anxiogenic stimuli, the  
19 fluorescence signals were extracted 5s~3s before and 1s~5s after stimulation  
20 starts and analyzed by one-tailed Mann-Whitney U test. The neurons were  
21 defined responsive when  $p < 0.05$ .

22

23 **In-vivo optogenetic manipulation**

1 For optogenetic manipulation, mice were accommodated with the connection of  
2 implanted optic fiber to a laser generator (SLOC lasers, China) by a mating  
3 sleeve for one week before formal experiments. On the testing day, the 473-nm  
4 light (5ms, 20 Hz, 2-5 mW) or 594-nm light (constant, 5-8 mW) was delivered for  
5 3 min during the “Light” phase only, controlled by an oscilloscope (Tektronix).  
6 The identical stimulus protocol was used for control mice.

7

### 8 **Electrophysiological recording**

9 The electrophysiological recording was performed as described previously (10).  
10 Briefly, mice were anesthetized with isoflurane, and brains were quickly collected  
11 and chilled in ice-cold modified artificial cerebrospinal fluid (ACSF) containing (in  
12 mM): 120 Choline-Cl, 2.5 KCl, 7 MgCl<sub>2</sub>, 0.5 CaCl<sub>2</sub>-2 H<sub>2</sub>O, 1.25 NaH<sub>2</sub>PO<sub>4</sub>-1 H<sub>2</sub>O,  
13 25 NaHCO<sub>3</sub>, and 10 D-glucose. Coronal brain slices (300 μm thickness) were  
14 sectioned in the same ice-cold modified ACSF using a VT-1000S vibratome  
15 (Leica, Germany) and kept in an incubation chamber that contains regular ACSF  
16 (in mM) (126 NaCl, 3 KCl, 1 MgSO<sub>4</sub>-7 H<sub>2</sub>O, 2 CaCl<sub>2</sub>-2 H<sub>2</sub>O, 1.25 NaH<sub>2</sub>PO<sub>4</sub>-1 H<sub>2</sub>O,  
17 26 NaHCO<sub>3</sub>, and 10 D-glucose) at 32 °C for 30 min. Sections were then stayed at  
18 room temperature (24 ± 1 °C) for an additional 1 hr prior to recording. All  
19 solutions were saturated with 95% O<sub>2</sub> / 5% CO<sub>2</sub> (vol/vol).

20 For neuronal recording, slices were transferred to a recording chamber  
21 with continuous perfusion of regular ACSF at a rate of 2 ml/min. Neurons of  
22 interest were visualized with infrared optics using an upright microscope  
23 (BX51WIF, Olympus) equipped with an infrared-sensitive CCD camera (DAGE-

1 MTI, IR-1000E). Glass pipettes were pulled by a micropipette puller (P-97, Sutter  
2 instrument) with a resistance of 3-5 M $\Omega$ . Whole-cell recordings were made with  
3 MultiClamp 700B amplifier and 1440A digitizer (Molecular Devices).

4 For optogenetic light-induced action potential recording, neurons were  
5 recorded under current-clamp mode, with the pipette solution containing (in mM):  
6 125 K-gluconate, 5 KCl, 10 HEPES, 0.2 EGTA, 1 MgCl<sub>2</sub>, 4 Mg-ATP, 0.3 Na-GTP  
7 and 10 phosphocreatine (pH 7.40, 285 mOsm). The 473 nm-lights (5 ms/pulse, 1  
8 s, 1-3 mW) at various frequencies (5-60 Hz) as indicated or 594 nm-lights (20 s)  
9 were given right above the neurons. Note that a positive current was injected into  
10 the neurons to elicit continuous firings during 594-nm lights inhibition experiment.

11 For optogenetic light-induced EPSC recording, neurons were held at -70  
12 mV in the presence of 20  $\mu$ M RS-95531, with the pipette solution containing (in  
13 mM): 125 Cs-methanesulfonate, 5 CsCl, 10 HEPES, 0.2 EGTA, 1 MgCl<sub>2</sub>, 4 Mg-  
14 ATP, 0.3 Na-GTP, 10 phosphocreatine and 5 QX314 (pH 7.40, 285 mOsm). The  
15 473 nm-lights (5 ms, 1-3 mV) were given at a frequency of 0.05 Hz to elicit  
16 EPSCs. TTX (1  $\mu$ M) was added to the perfusion solution, followed by the addition  
17 of 4-aminopyridine (4-AP, 1 mM).

18 sEPSCs were recorded under the same condition as optogenetic light-  
19 induced EPSC recording. In the optogenetic experiment, the 594 nm-lights were  
20 continuously given for 1 min during the "Light" phase.

21 To record sIPSC, neurons were held at -70 mV in the presence of 20  $\mu$ M  
22 CNQX and 100  $\mu$ M AP-5, with the pipette solution containing (in mM): 140 CsCl,



1 10 Hepes, 0.2 EGTA, 1 MgCl<sub>2</sub>, 4 Mg-ATP, 0.3 Na-GTP, 10 phosphocreatine and  
2 5 QX314 (pH 7.40, 285 mOsm).

3 The excitability of PrL neurons was detected under current-clamp mode. A  
4 series of depolarizing pulses (from 0 pA to 120 pA, at a step of 20 pA) were  
5 injected to induce action potentials. The RMP and input resistance were detected  
6 by injecting a series of negative current pulses (0 pA, -50 pA, -100 pA). In some  
7 experiments, 20 μM CNQX, 50 μM AP-5, and 10 μM RS-95531 were added into  
8 the perfusion solution to block synaptic activity to record the intrinsic neuronal  
9 excitability.

10 To examine AMPAR and NMDAR mediated currents, EPSCs were  
11 recorded at -70 mV and +40 mV holding potentials in the presence of 20 μM RS-  
12 95531. A concentric bipolar electrode (CBARC75, FHC), ~ 200 μm away from  
13 the recording pipette, was used to elicit stimulations. AMPAR and NMDAR  
14 mediated currents were calculated as the peak amplitudes and 50 ms after the  
15 peak amplitude, respectively. For PPRs analysis, EPSCs were evoked at a  
16 holding potential of -70 mV in the presence of 20 μM RS-95531. Interval of paired  
17 stimulations was set at 50, 100, 200 and 300 ms. The value of ratios was defined  
18 as  $[p2 / p1] \times 100$ , where p1 and p2 are the amplitude of the EPSCs evoked by  
19 the first and second pulse, respectively.

20 A peak-scaled non-stationary fluctuation analysis was performed on  
21 sEPSCs of PrL<sup>BLA</sup> neurons based on a previous report (11). Briefly, sEPSCs  
22 were selected following the criteria: stable baseline, fast rise time alignment, and  
23 the absence of spurious fluctuations during the sEPSC decay. Theoretically, the

1 decay phase of each EPSC varies from the mean decay of all the EPSCs when  
2 scaled to the same peak amplitude, and the plot of the variance of current  
3 amplitude during decay phase against the current amplitude is parabolic, of  
4 which the initial slope indicates the mean single-channel conductance.  
5 Accordingly, the variance of sEPSCs amplitudes during decay phase was plotted  
6 against the amplitudes during decay phase after the sEPSCs were peak scaled.  
7 The equation  $\sigma^2 = iI - I^2/N + \sigma_b^2$  was used to fit the parabola. Note that  $i$  is the  
8 mean single-channel mediated current,  $I$  is the mean current,  $N$  is the number of  
9 channels activated at the peak, and  $\sigma_b^2$  is the baseline variance. " $i$ " was  
10 calculated as the slope of the linear fit of the first portion of the parabola. The  
11 single-channel conductance was estimated based on the reversal potential of  
12 eEPSCs (~0 mV) and the holding potential (-70 mV).

13 In all, series resistance was maintained below 20 M $\Omega$  and not  
14 compensated. Cells would be excluded if membrane potentials were positive  
15 more than -60 mV; or if series resistance fluctuated more than 20% of initial  
16 values. Data were filtered at 2 kHz and sampled at 10 kHz.

17

## 18 **Postsynaptic fractionation**

19 Postsynaptic fractions were prepared as described in previous reports (4, 12). In  
20 brief, brain tissues were immediately homogenized in 10 volumes of buffered  
21 sucrose (0.32 M sucrose and 4 mM HEPES/NaOH, containing protease inhibitors  
22 and phosphatase inhibitors, pH 7.4) with a glass-teflon homogenizer on ice.  
23 Homogenates were centrifuged at 1000 g for 10 min to remove nuclei and large

1 debris, supernatant (S1) collected and centrifuged at 10,000 g for 15 min to  
2 obtain the crude synaptosome containing pellet (P2). The P2 pellet was  
3 resuspended in ddH<sub>2</sub>O to dissociate the synaptosome within 10 s, and then  
4 balanced and incubated in a buffer on a rotator at 4 °C for 30 min. The  
5 resuspended P2 was centrifuged at 25,000 g for 20 min and the pellet containing  
6 synaptosomal membrane fraction (P3) resuspended in the discontinuous  
7 gradient sucrose solution (0.8,1.0,1.2 M, top to bottom), which was centrifuged at  
8 150,000 g at 4 °C for 2 hr. Among the layered solution, a synaptosomal plasma  
9 membrane fraction resided at 1.0 M/1.2 M sucrose interface. Pipette out the  
10 fraction gently, then incubate with 1% Triton X-100 in 50 nM HEPES buffer at  
11 4 °C for 30 min. After centrifugation at 25,000 g for 1hr, the supernatant was  
12 decanted, and the pellet containing postsynaptic membrane fractions was  
13 homogenized in RIPA buffer (Beyotime, P0013B) containing 1 mM PMSF  
14 (Beyotime, ST506). Samples were centrifuged at 14,000 g for 10 min, and the  
15 supernatant was collected. Protein concentrations were determined using a BCA  
16 protein assay kit (Pierce™, Catalog Number: 23225) with BSA (bovine serum  
17 albumin) as a standard. All samples were diluted to equal protein concentrations  
18 in sample loading buffer (6-8 µg/µl) and subjected to Western blotting.

19

## 20 **Western blotting**

21 As described previously with minor modification (13), the brains slices were cut  
22 using a VT-1000S vibratome (Leica, Germany). The PrL region was located  
23 under a fluorescence microscope (Eclipse Si, Nikon), and extracted using a fine

1 micro-forceps for homogenization. In some experiments, only the infection areas  
2 in the PrL region (green fluorescence), identified under the same fluorescence  
3 microscope, were collected for homogenization. Samples were subjected to  
4 SDS-PAGE and transferred to a PVDF membrane (Millipore, ISEQ00010). After  
5 blocking with 5% non-fat dry milk in TBS for 1 hr at room temperature, blots were  
6 probed overnight with primary antibody at 4 °C. After washing with TBST,  
7 membranes were incubated with horseradish peroxidase (HRP)-conjugated  
8 secondary antibodies (A0208 and A0216, Beyotime) for 1 hr at room temperature.  
9 Following washing, immunoreactive complex bands were visualized using  
10 enhanced chemiluminescence (Pierce) and captured using the Genesys imaging  
11 system (Gene Company Limited). Band densities of proteins of interest were  
12 normalized with a loading control.

13

#### 14 **RNA sequencing**

15 RNA sequencing was performed as described previously (13). In brief, total RNA  
16 was extracted from PrL tissue using TRIzol reagent (Invitrogen, Carlsbad, USA)  
17 following the manufacturer's procedure. The amount and purity of RNA were  
18 quantified using NanoDrop ND-1000 (NanoDrop, USA). RNA integrity was  
19 assessed using Bioanalyzer 2100 (Agilent, USA) with RIN >7.0, followed by  
20 electrophoresis with denaturing agarose gel. Poly (A) RNA is purified from 1µg of  
21 RNA with Dynabeads Oligo (dT)25-61005 (Thermo Fisher, USA), fragmented  
22 into small pieces using Magnesium RNA Fragmentation Module (NEB, USA)  
23 under 94 °C for 5 – 7 min, and reverse-transcribed to generate the cDNA using

1 SuperScript™ II Reverse Transcriptase (Invitrogen, USA), which were then used  
2 to synthesize U-labeled second-stranded DNAs with E. coli DNA polymerase I  
3 (NEB, cat.m0209, USA), RNase H (NEB, USA) and dUTP Solution (Thermo  
4 Fisher, USA). An A-base is added to the blunt ends of each strand for ligation to  
5 the indexed adapters. Each adapter contains a T-base overhang for ligating the  
6 adapter to the A-tailed fragmented DNA. Following ligating the single- or dual-  
7 index adapters to the fragments, the size selection was performed with  
8 AMPureXP beads. After the treatment of the U-labeled second-stranded DNAs  
9 with the heat-labile UDG enzyme (NEB, USA), the ligated products are amplified  
10 with PCR with the following conditions: initial denaturation at 95 °C for 3 min; 8  
11 cycles of denaturation at 98 °C for 15 s, annealing at 60 °C for 15 s, extension at  
12 72 °C for 30 s, and final extension at 72 °C for 5 min. The average insert size for  
13 the final cDNA library was 300 ± 50 bp. The 2×150bp paired-end sequencing  
14 (PE150) on an Illumina Novaseq™ 6000 was performed following the vendor's  
15 recommended protocol.

16

### 17 **Transcriptome analysis**

18 For transcriptome analysis, fastp software (<https://github.com/OpenGene/fastp>)  
19 was used to exclude the reads containing adaptor contamination, base with low  
20 quality, and undetermined bases with default parameters and verify the quality of  
21 the sequence. The reads were mapped with HISAT2  
22 (<https://ccb.jhu.edu/software/hisat2>) and assembled using StringTie  
23 (<https://ccb.jhu.edu/software/stringtie>) with default parameters. All transcriptomes

1 from all samples were then merged to reconstruct a comprehensive  
2 transcriptome with gffcompare (<https://github.com/gperte/gffcompare/>).  
3 StringTie was used to perform expression level for mRNAs by calculating FPKM  
4 (FPKM = [total\_exon\_fragments / mapped\_reads (millions) x exon\_length (kB)]).  
5 The differentially expressed genes (DEGs) analysis was performed with a  
6 parametric F-test by comparing nested linear models (adjustive  $p$  value < 0.05)  
7 with edgeR (R package)  
8 (<https://bioconductor.org/packages/release/bioc/html/edgeR.html>). GO and  
9 KEGG enrichment analysis of DEGs was performed with R pack clusterProfiler  
10 (<https://bioconductor.org/packages/release/bioc/html/clusterProfiler.html>). The  
11 raw dataset has been deposited in the Gene Expression Omnibus (GEO)  
12 database (GSE214204).

13

#### 14 **Cytokine detection**

15 Mice were anesthetized with isoflurane and transcardially perfused with ice-cold  
16 0.01M PBS to exclude the circulating blood. PrL tissues were then collected and  
17 transferred into a tube containing PBS for homogenization, followed by  
18 centrifugation at 4 °C with a velocity of 1,000 g for 10 min. Supernatants were  
19 collected and stored at -80 °C until use. The amounts of TNF- $\alpha$ , IL-1 $\beta$ , IL-10, and  
20 IL-6 were determined using Mouse QuantiCyto cytokines ELISA Kits (EMC102a,  
21 EMC001b, EMC005, EMC004, Neobioscience) following the manufacturer's  
22 instruction. Infinite M200 Pro NanoQuant was used to detect OD value. Data  
23 were analyzed by i-control 2.0 software.

1

## 2 **Single-cell RNA extraction**

3 Single-cell RNA extraction was performed according to a previous report with  
4 minor modification (14). In brief, the work surfaces were carefully cleaned with  
5 DNA-OFF (9036, Takara) and RNase Zap (AM9780, Life Technologies) to  
6 maintain an RNase-free environment. Autoclaved glass pipettes (O.D.: 1.5 mm,  
7 I.D.: 1.1 mm, Sutter Instruments) with a resistance of 1-2 M $\Omega$  were back-filled  
8 with ~1.0  $\mu$ l of RNase-free solution containing (in mM): 125 K-gluconate, 12 KCl,  
9 10 HEPES, 0.2 EGTA, 4 MgATP, 0.3 NaGTP, 10 Na phosphocreatine, 20  $\mu$ g/ml  
10 glycogen, and 1 U/ $\mu$ l recombinant RNase inhibitor (2323A, Takara) (pH 7.40, 285  
11 mOsm). Neurons of interest (visualized under a fluorescent microscope) were  
12 aspirated into the tip of pipettes by applying a light suction and then ejected using  
13 positive pressure into an RNase-free PCR tube with 4  $\mu$ l of RNase-free lysis  
14 buffer supplied by the Single Cell Sequence-Specific Amplification Kit (P621-01,  
15 Vazyme), and then subjected to reverse transcription, amplification and further  
16 quantitative RT-PCR (qRT-PCR) following the manufacturer's instruction.

17

## 18 **qRT-PCR**

19 The qRT-PCR was performed as described previously (10). Briefly, fine pieces of  
20 PrL tissues were subjected to total RNA extraction using TRIzol reagent (15596-  
21 026, Invitrogen). RNA (1  $\mu$ g) was reversely transcribed with oligo dT-primers  
22 using Maxima reverse transcriptase (EP0742, Fermentas) to generate cDNA,  
23 followed by qPCR with SYBR Green detection (K0222, Fermentas). Each sample

1 was assayed in triplicates, and each plate contained loading standards in  
2 duplicate. The mRNA levels of various genes were normalized to those of  
3 GAPDH. Primer sequences were: *Tnfa*: 5'- GGA ACA CGT CGT GGG ATA ATG  
4 -3' and 5'- GGC AGA CTT TGG ATG CTT CTT -3'; *I16*: 5'- TCC AGT TGC CTT  
5 CTT GGG AC -3' and 5'- GTG TAA TTA AGC CTC CGA CTT G -3'; *Tnfr1*: 5'-  
6 GCA GTG TCT CAG TTG CAA GAC ATG TCG G -3' and 5'- CGT TGG AAC  
7 TGG TTC TCC TTA CAG CCA C -3'; *Tnfr2*: 5'- ACA GTG CCC GCC CAG GTT  
8 GTC TTG -3' and 5'- GCA GAA ATG TTT CAC ATA TTG GCC AGG AGG -3';  
9 *GAPDH*, 5'- GGT TGT CTC CTG CGA CTT CA -3' and 5'- CCA CCA CCC TGT  
10 TGC TGT AG -3'.



## 1   **References**

2

- 3   1.    Decosterd I, and Woolf CJ. Spared nerve injury: an animal model of  
4       persistent peripheral neuropathic pain. *Pain*. 2000;87(2):149-58.
- 5   2.    Liu WZ, Zhang WH, Zheng ZH, Zou JX, Liu XX, Huang SH, et al.  
6       Identification of a prefrontal cortex-to-amygdala pathway for chronic  
7       stress-induced anxiety. *Nat Commun*. 2020;11(1):2221.
- 8   3.    Bourquin AF, Süveges M, Pertin M, Gilliard N, Sardy S, Davison AC, et al.  
9       Assessment and analysis of mechanical allodynia-like behavior induced  
10      by spared nerve injury (SNI) in the mouse. *Pain*. 2006;122(1-2):14.e1-.
- 11  4.    Sun XD, Chen WB, Sun D, Huang J, Li YQ, Pan JX, et al. Neogenin in  
12      Amygdala for Neuronal Activity and Information Processing. *J Neurosci*.  
13      2018;38(44):9600-13.
- 14  5.    Ren J, Lu CL, Huang J, Fan J, Guo F, Mo JW, et al. A Distinct  
15      Metabolically Defined Central Nucleus Circuit Bidirectionally Controls  
16      Anxiety-Related Behaviors. *J Neurosci*. 2022;42(11):2356-70.
- 17  6.    Low RJ, Gu Y, and Tank DW. Cellular resolution optical access to brain  
18      regions in fissures: imaging medial prefrontal cortex and grid cells in  
19      entorhinal cortex. *Proc Natl Acad Sci U S A*. 2014;111(52):18739-44.
- 20  7.    Moda-Sava RN, Murdock MH, Parekh PK, Fetcho RN, Huang BS, Huynh  
21      TN, et al. Sustained rescue of prefrontal circuit dysfunction by  
22      antidepressant-induced spine formation. *Science*. 2019;364(6436).

- 1 8. Zhou Y, Lai CSW, Bai Y, Li W, Zhao R, Yang G, et al. REM sleep  
2 promotes experience-dependent dendritic spine elimination in the mouse  
3 cortex. *Nat Commun.* 2020;11(1):4819.
- 4 9. Cantu DA, Wang B, Gongwer MW, He CX, Goel A, Suresh A, et al.  
5 EZcalcium: Open-Source Toolbox for Analysis of Calcium Imaging Data.  
6 *Front Neural Circuits.* 2020;14:25.
- 7 10. Sun XD, Li L, Liu F, Huang ZH, Bean JC, Jiao HF, et al. Lrp4 in astrocytes  
8 modulates glutamatergic transmission. *Nat Neurosci.* 2016;19(8):1010-8.
- 9 11. Valentinova K, Tchenio A, Trusel M, Clerke JA, Lalive AL, Tzanoulinou S,  
10 et al. Morphine withdrawal recruits lateral habenula cytokine signaling to  
11 reduce synaptic excitation and sociability. *Nat Neurosci.* 2019;22(7):1053-  
12 6.
- 13 12. Wang YN, Figueiredo D, Sun XD, Dong ZQ, Chen WB, Cui WP, et al.  
14 Controlling of glutamate release by neuregulin3 via inhibiting the assembly  
15 of the SNARE complex. *Proc Natl Acad Sci U S A.* 2018;115(10):2508-13.
- 16 13. Wang J, Huang J, Li YQ, Yao S, Wu CH, Wang Y, et al. Neuregulin  
17 1/ErbB4 signaling contributes to the anti-epileptic effects of the ketogenic  
18 diet. *Cell Biosci.* 2021;11(1):29.
- 19 14. Chen YH, Hu NY, Wu DY, Bi LL, Luo ZY, Huang L, et al. PV network  
20 plasticity mediated by neuregulin1-ErbB4 signalling controls fear extinction.  
21 *Mol Psychiatry.* 2022;27(2):896-906.

1 **Supplemental Figures**

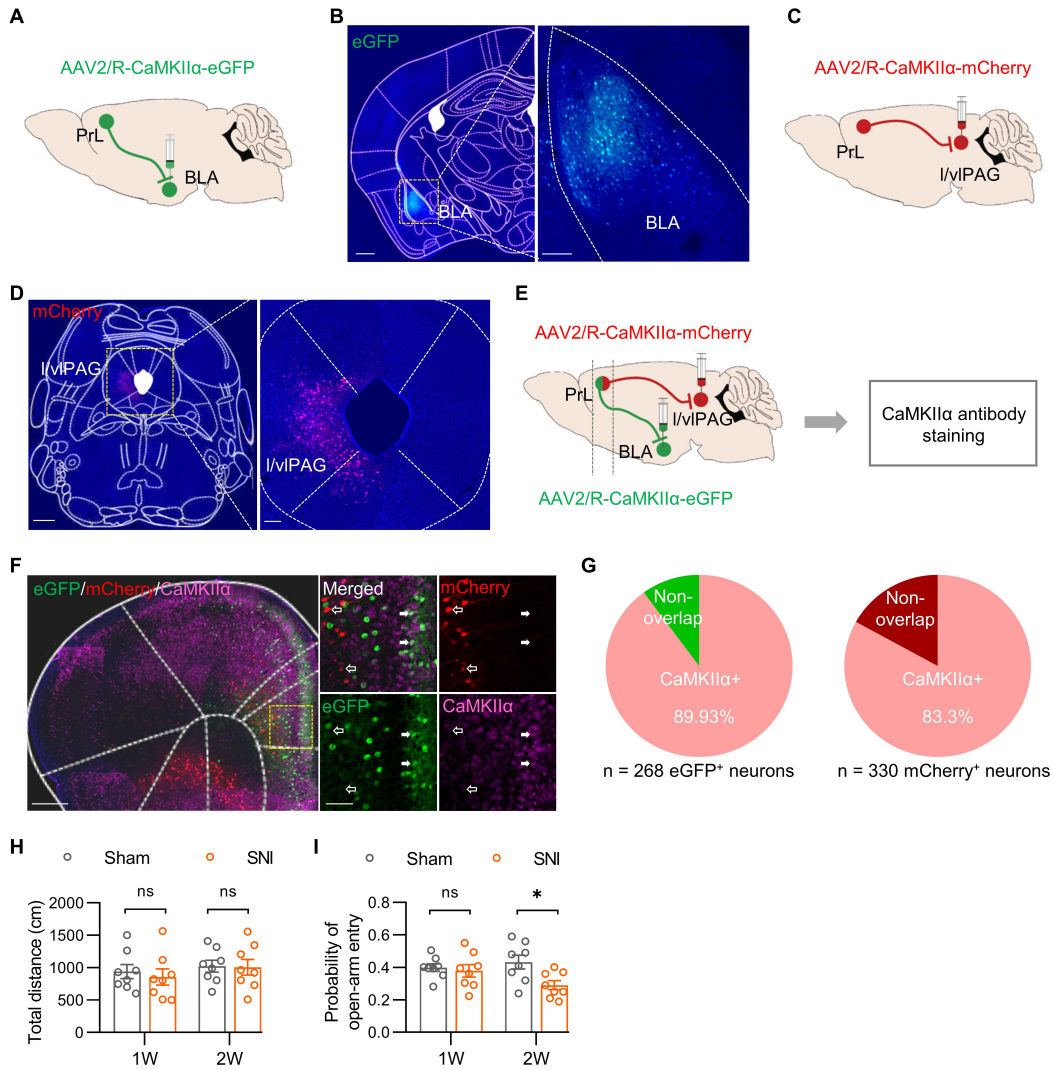

2

3 **Supplemental Figure 1 Characterization of virus-injection sites, the identity**

4 **of PrL<sup>BLA</sup> and PrL<sup>I/vIPAG</sup> neurons, and chronic pain model. (A)** Schematic

5 showing injection of retrograde AAV-CaMKIIα-eGFP virus into the BLA. (B)

6 Representative image showing expression of eGFP in the BLA. Right, enlarged

7 dotted area in the left image. Scale bars, 500 μm (Left) and 100 μm (Right). (C)

8 Schematic showing injection of retrograde AAV-CaMKIIα-mcherry virus into the

9 I/vIPAG. (D) Representative image showing expression of mcherry in the I/vIPAG.

1 Right, enlarged dotted area in the left image. Scale bars, 500  $\mu\text{m}$  (Left) and 100  
2  $\mu\text{m}$  (Right). **(E)** Schematic showing injections of retrograde AAV-CaMKII $\alpha$ -eGFP  
3 and AAV-CaMKII $\alpha$ -mcherry virus into the BLA and I/VPAG, respectively. Three  
4 weeks later, brain slices containing PrL were subjected to CaMKII $\alpha$  antibody  
5 staining. **(F)** Representative image showing expression of eGFP, mcherry and  
6 CaMKII $\alpha$  in the PrL. Right, enlarged dotted area in the left image. Hollow arrow,  
7 co-staining between mcherry and CaMKII $\alpha$ ; solid arrow, co-staining between  
8 eGFP and CaMKII $\alpha$ . Scale bars, 500  $\mu\text{m}$  (Left) and 50  $\mu\text{m}$  (Right). **(G)**  
9 Quantification of percentage of CaMKII $\alpha$  in eGFP<sup>+</sup> or mcherry<sup>+</sup> neurons as in **F**. n  
10 = 268 eGFP<sup>+</sup> neurons from 3 mice; n = 330 mcherry<sup>+</sup> neurons from 3 mice. **(H)**  
11 Not changed total distance in SNI mice. n = 8 mice per group. **(I)** Reduced  
12 probability of open-arm entry two weeks after SNI surgery. n = 8 mice per group.  
13 Data were shown as mean  $\pm$  SEM. \* $p < 0.05$ ; ns, no significant difference. Two-  
14 way repeated measures ANOVA followed by post-hoc Sidak's test (**H**, **I**).

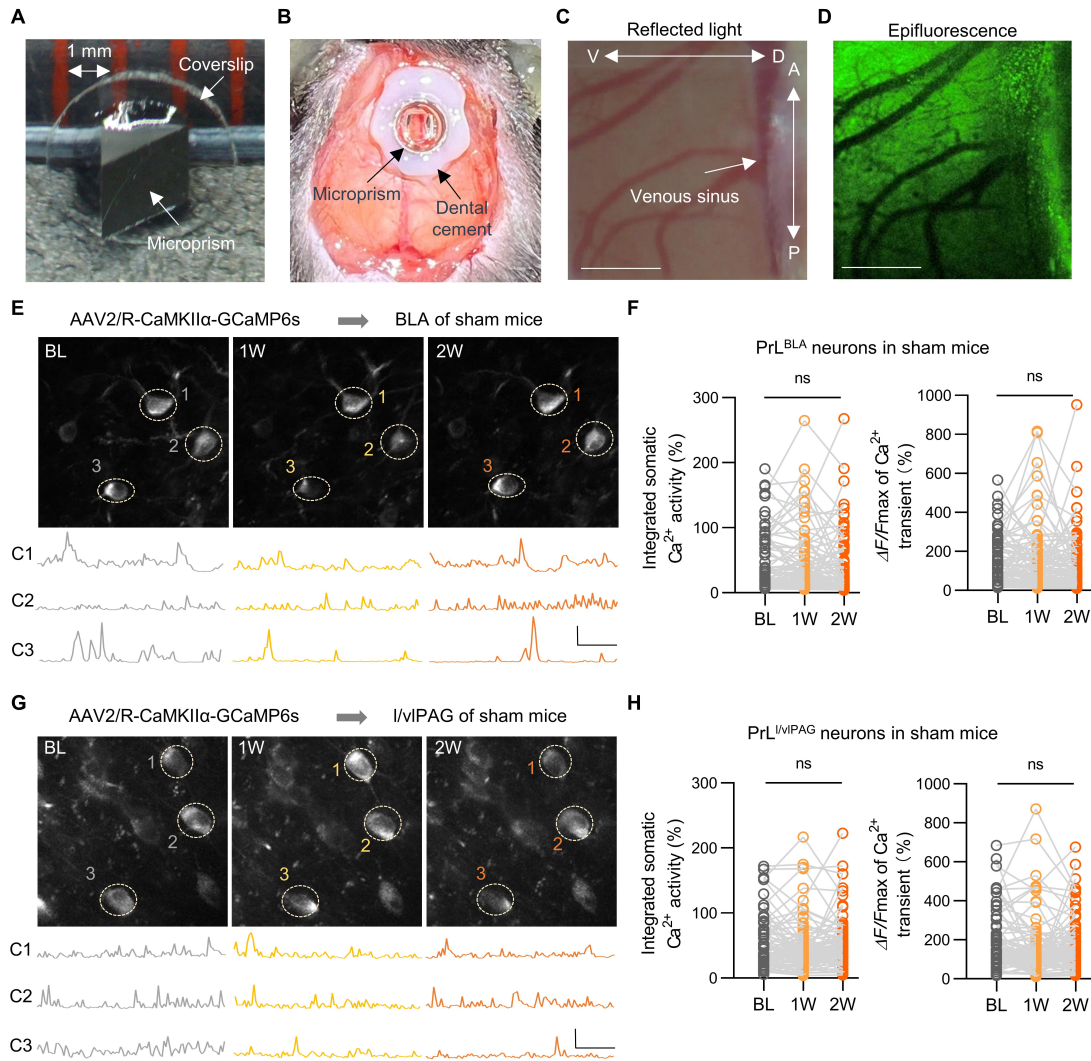

1

2 **Supplemental Figure 2 Unchanged  $\text{Ca}^{2+}$  activity of  $\text{PrL}^{\text{BLA}}$  and  $\text{PrL}^{\text{lVPAG}}$**   
 3 **neurons in sham mice. (A)** Assembly of microprism implant. **(B)** implantation of  
 4 microprism. **(C)** Widefield reflected light image of the mPFC through the  
 5 implanted microprism. V, ventral; D, dorsal; A, anterior; P, posterior. Scale bar,  
 6 500  $\mu\text{m}$ . **(D)** Epifluorescence image of the same region as in **C**. Scale bar, 500  
 7  $\mu\text{m}$ . **(E)** Representative somatic  $\text{Ca}^{2+}$  fluorescent images of  $\text{PrL}^{\text{BLA}}$  neurons  
 8 before (BL), one week (1W) and two weeks (2W) after sham surgery. Bottom,  
 9  $\text{Ca}^{2+}$  fluorescent traces from the numbered neurons (C1, C2, C3) which are

1 circled in the upper images. Scale bars, 10  $\mu\text{m}$  (upper); 500%  $\Delta F/F$  and 20 s  
2 (bottom). **(F)** Not changed somatic  $\text{Ca}^{2+}$  activity and peak amplitude of  $\text{Ca}^{2+}$   
3 transients of  $\text{PrL}^{\text{BLA}}$  neurons in sham mice.  $n = 114$  neurons from 5 sham mice.  
4 **(G)** Representative somatic  $\text{Ca}^{2+}$  fluorescent images of  $\text{PrL}^{\text{VIPAG}}$  neurons. Bottom,  
5  $\text{Ca}^{2+}$  fluorescent traces from the numbered neurons (C1, C2, C3) which are  
6 circled in the upper images. Scale bars, 10  $\mu\text{m}$  (upper); 500%  $\Delta F/F$  and 20 s  
7 (bottom). **(H)** Not changed somatic  $\text{Ca}^{2+}$  activity and peak amplitude of  $\text{Ca}^{2+}$   
8 transients of  $\text{PrL}^{\text{VIPAG}}$  neurons in sham mice.  $n = 94$  neurons from 4 sham mice.  
9 Data were shown as aligned dot plots. ns, no significant difference. Friedman test  
10 **(F, H)**.

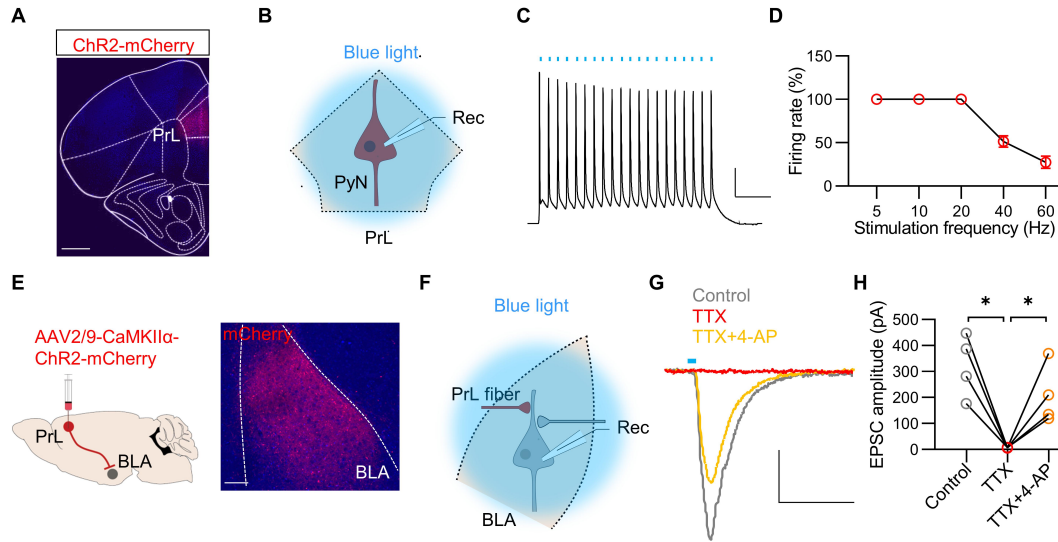

1

2 **Supplemental Figure 3 Characterization of PrL-BLA circuit by optogenetics.**

3 (A) Representative image showing expression of mcherry in the PrL. Scale bar,

4 500  $\mu\text{m}$ . (B) Schematic showing recording of pyramidal neurons (PyN) in the PrL

5 in response to blue light stimulation. Rec, record. (C) Representative trace

6 showing induction of action potentials with a burst of blue lights at a frequency of

7 20 Hz. Scale bar, 20 mV and 200 ms. (D) Quantitative data of firing rates induced

8 by blue lights at various frequencies.  $n = 9$  neurons from 3 mice. (E) Schematic

9 of viral injection (Left) and representative image showing expression of mcherry

10 in the BLA (Right). Scale bar, 100  $\mu\text{m}$ . (F) Schematic of neuronal recording in the

11 BLA in response to optogenetic stimulation of PrL inputs. Rec, record. (G)

12 Representative traces of EPSCs evoked by blue light without (Control) and with

13 TTX or TTX+4-AP. Scale bars, 40 ms and 100 pA. (H) Quantitative data.  $n = 4$

14 neurons from 3 mice. Data were shown as aligned dot plots.  $*p < 0.05$ . Repeated

15 one-way ANOVA followed by post-hoc Turkey's test (H).

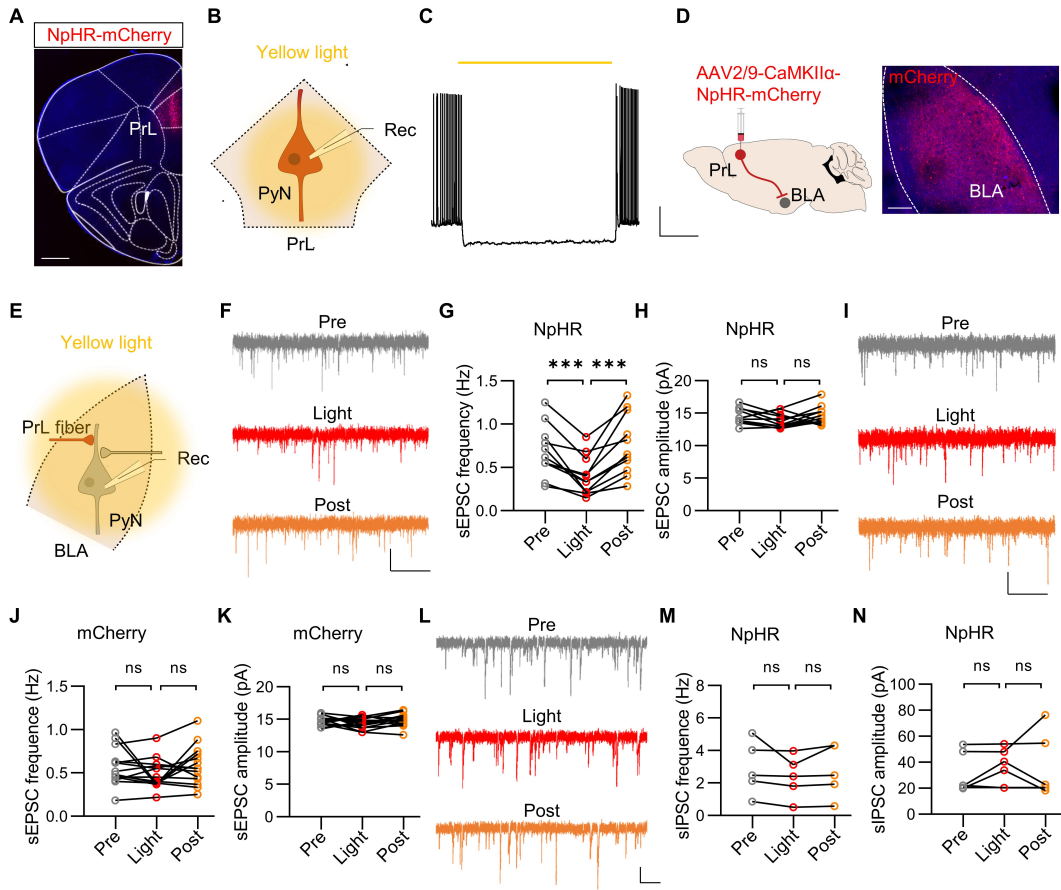

1

2 **Supplemental Figure 4 Characterization of the effects of optogenetic**  
 3 **inhibition of PrL-BLA circuit on synaptic activity. (A)** Representative image  
 4 showing expression of mcherry in the PrL. Scale bar, 500  $\mu$ m. **(B)** Schematic  
 5 showing recording of pyramidal neurons (PyN) in the PrL in response to yellow  
 6 light inhibition. Rec, record. **(C)** Representative trace showing that a neuron was  
 7 silenced by a period of yellow light. Scale bar, 5 s and 20 mV. **(D)** Schematic of  
 8 viral injection (Left) and representative image showing expression of mcherry in  
 9 the BLA (Right). Scale bar, 100  $\mu$ m. **(E)** Schematic of recording in the BLA  
 10 pyramidal neurons (PyN) in response to optogenetic inhibition of PrL inputs. Rec,  
 11 record. **(F)** Representative sEPSC traces of BLA neurons with optogenetic  
 12 inhibition of NpHR-expressing input. Scale bars, 2 s and 10 pA. **(G)** Decreased



1 sEPSC frequency. n = 12 neurons from 3 mice. **(H)** Unchanged sEPSC  
2 amplitude. n = 12 neurons from 3 mice. **(I)** Representative sEPSC traces of BLA  
3 neurons with optogenetic inhibition of mcherry-expressing input. Scale bars, 2 s  
4 and 10 pA. **(J)** Unchanged sEPSC frequency. n = 14 neurons from 3 mice. **(K)**  
5 Unchanged sEPSC amplitude. n = 14 neurons from 3 mice. **(L)** Representative  
6 sIPSC traces of BLA neurons with optogenetic inhibition of NpHR-expressing  
7 input. Scale bars, 500 ms and 10 pA. **(M)** Unchanged sIPSC frequency. n = 5  
8 neurons from 3 mice. **(N)** Unchanged sIPSC amplitude. n = 5 neurons from 3  
9 mice. Data were shown as aligned dot plots. \*\*\* $p < 0.001$ ; ns, no significant  
10 difference. Repeated one-way ANOVA followed by post-hoc Turkey's test (**G**, **H**,  
11 **J**, **K**, **M**); Friedman test (**N**).

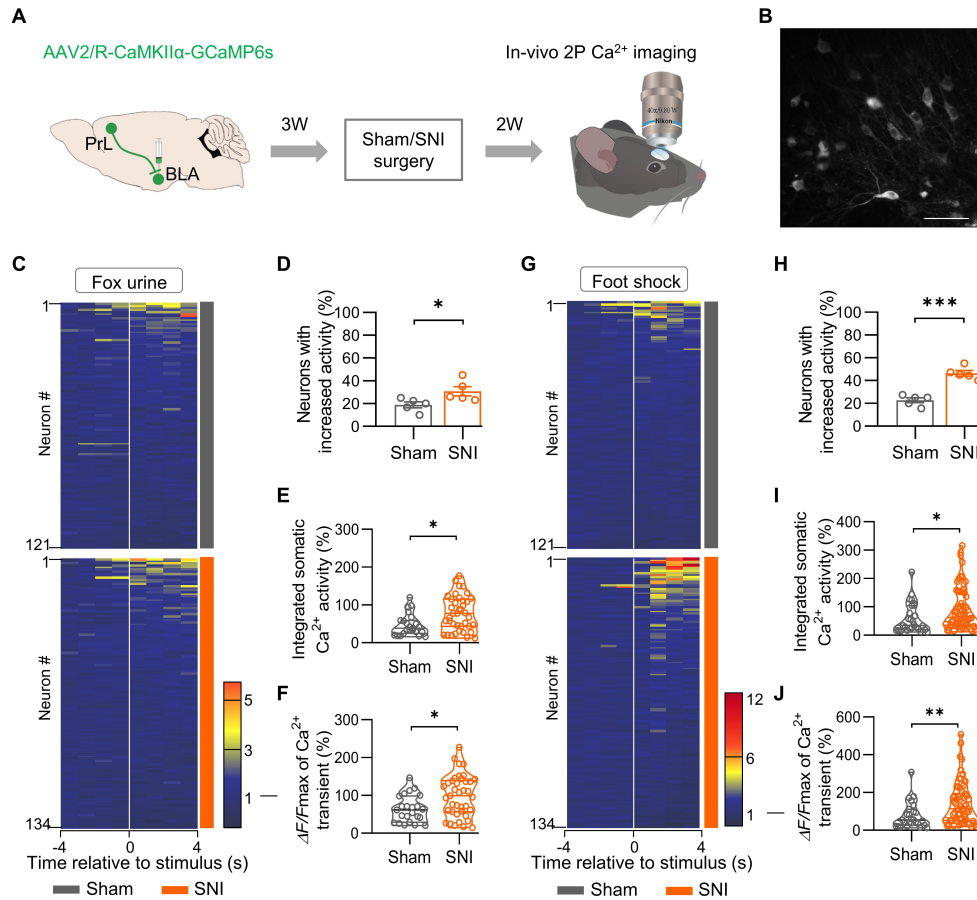

1

2 **Supplemental Figure 5 Characterization of the activities of PrL<sup>BLA</sup> neurons**

3 **in response to fox urine and foot shock stimuli. (A) Time scheme for in-vivo**

4 **two photon Ca<sup>2+</sup> recording of PrL<sup>BLA</sup> neurons. 2P, two-photon. (B) Image of**

5 **PrL<sup>BLA</sup> neurons expressing GCaMP6s. Scale bar, 30  $\mu$ m. (C) Heatmaps showing**

6 **the changes of somatic Ca<sup>2+</sup> activity of all neurons from sham (Top) and SNI**

7 **(Bottom) mice in response to fox urine. Neurons were aligned from high to low**

8 **Ca<sup>2+</sup> activity. (D) Increased proportions of “increased” PrL<sup>BLA</sup> neurons of PrL<sup>BLA</sup>**

9 **neurons in response to fox urine. n = 5 mice per group. (E) Increased integrated**

10 **somatic Ca<sup>2+</sup> activity of responsive PrL<sup>BLA</sup> neurons in SNI mice in response to fox**

11 **urine. n = 23 and 39 neurons from 5 sham and 5 SNI mice, respectively. (F)**

12 **Increased peak amplitude of Ca<sup>2+</sup> transients of responsive PrL<sup>BLA</sup> neurons in SNI**

1 mice in response to fox urine. n = 23 and 39 neurons from 5 sham and 5 SNI  
2 mice, respectively. **(G)** Heatmaps showing the changes of somatic Ca<sup>2+</sup> activity  
3 of all neurons from sham (Top) and SNI (Bottom) mice in response to foot shock  
4 (0.5 mA, 1 s). **(H)** Proportions of PrL<sup>BLA</sup> neurons in response to foot shock. n = 5  
5 mice per group. **(I)** Increased integrated somatic Ca<sup>2+</sup> activity of responsive  
6 PrL<sup>BLA</sup> neurons in SNI mice. n = 27 and 62 neurons from 5 sham and 5 SNI mice,  
7 respectively. **(J)** Increased peak amplitude of Ca<sup>2+</sup> transients of responsive  
8 PrL<sup>BLA</sup> neurons in SNI mice. n = 27 and 62 neurons from 5 sham and 5 SNI mice,  
9 respectively. Data were shown as mean ± SEM and aligned dot plots. \**p* < 0.05;  
10 \*\**p* < 0.01. student's *t* test (**D, E, F, H**); Mann-Whitney U test (**I, J**).

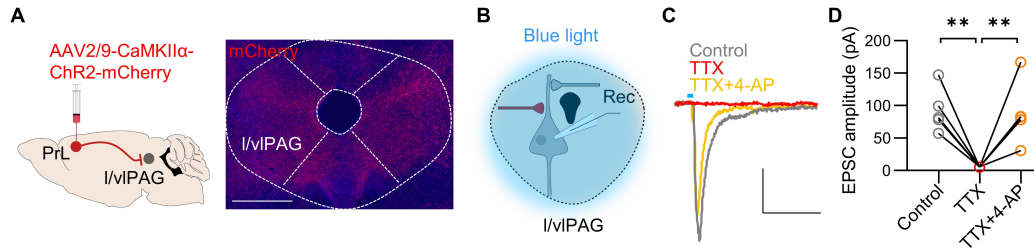

1

2 **Supplemental Figure 6 Characterization of PrL-I/vIPAG circuit by**

3 **optogenetics. (A)** Schematic of viral injection (Left) and representative image

4 showing expression of mcherry in the I/vIPAG (Right). Scale bar, 500  $\mu$ m. **(B)**

5 Schematic of neuronal recording in the I/vIPAG in response to optogenetic

6 stimulation of PrL inputs. Rec, record. **(C)** Representative traces of EPSCs

7 evoked by blue light without (Control) and with TTX or TTX+4-AP. Scale bars, 40

8 ms and 30 pA. **(D)** Quantitative data. n = 5 neurons. Data were shown as aligned

9 dot plot.  $**p < 0.01$ . Repeated one-way ANOVA followed by post-hoc Turkey's

10 test **(D)**.

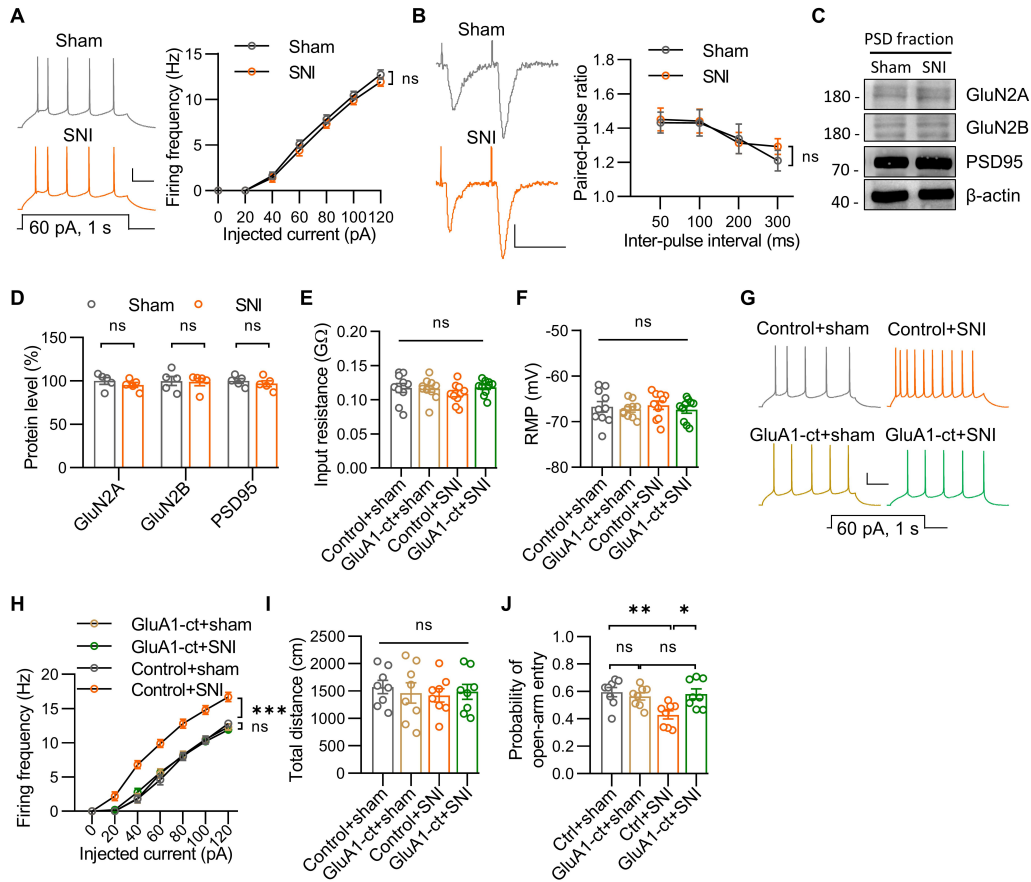

1

2 **Supplemental Figure 7 Characterization of electrophysiological properties**

3 **of PrL<sup>BLA</sup> neurons and effects of GluA1-ct expression on neuronal**

4 **excitability and behaviors. (A) Unaltered intrinsic firing frequencies of PrL<sup>BLA</sup>**

5 **neurons in SNI mice. Left, representative firing traces. Scale bars, 200 ms, 20**

6 **mV. Right, quantitative data. n = 11, 12 neurons from 3 sham, 3 SNI mice. (B)**

7 **Comparable paired-pulse ratios of PrL<sup>BLA</sup> neurons. n = 20, 22 neurons from 4**

8 **sham, 4 SNI mice. (C) Representative western blots. (D) Quantitative data in C. n**

9 **= 5 mice per group. (E, F) Comparable input resistance (E) and RMP (F) of**

10 **PrL<sup>BLA</sup> neurons. n = 10 neurons from 3 mice per group. (G) Representative firing**

11 **traces. Scale bars, 200 ms, 20 mV. (H) Reversed firing frequencies of PrL<sup>BLA</sup>**

12 **neurons in SNI mice with expression of GluA1-ct. n = 10 neurons from 3 mice per**

1 group. **(I)** Unchanged distance in OFT. n = 8 mice per group. **(J)** Reversed  
2 probability of open-arm entry in SNI mice by expressing GluA1-ct. n = 8 mice per  
3 group. Data were shown as mean  $\pm$  SEM. \* $p$  < 0.05; \*\* $p$  < 0.01; \*\*\* $p$  < 0.001; ns,  
4 no significant difference. Two-way repeated-measures ANOVA (**A**, **B**, **H**);  
5 Student's *t* test (**D**); Mann-Whitney U test (**D**); One-way ANOVA followed by post-  
6 hot Turkey's test (**E**, **F**, **I**, **J**).

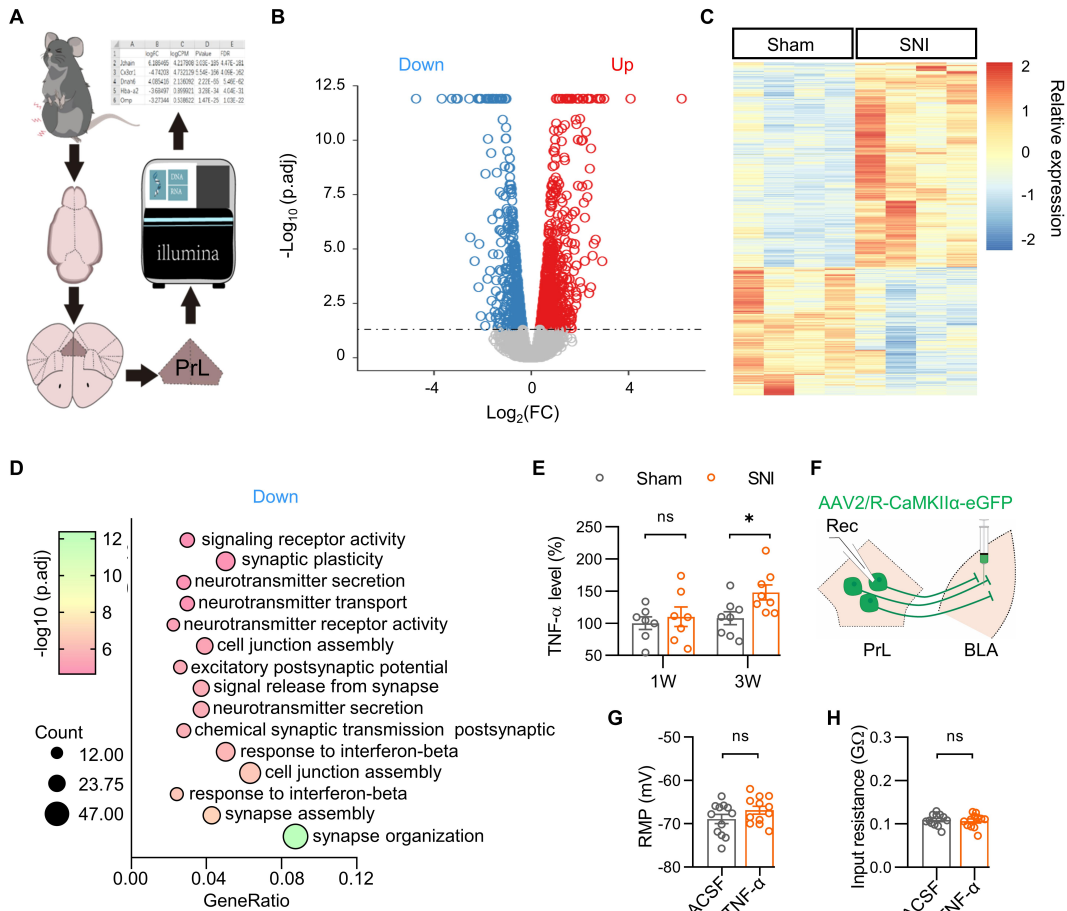

1

2 **Supplemental Figure 8 Analysis of RNAseq data obtained from PrL of**  
 3 **chronic pain model and the effects of TNF- $\alpha$  on passive membrane**  
 4 **properties of PrL<sup>BLA</sup> neurons. (A) Schematic of experiments. PrL tissues of**  
 5 **chronic pain model were collected and subjected to bulk RNA sequencing. (B)**  
 6 **Volcano plots of differentially expressed genes (DEGs) between Sham and**  
 7 **SNI mice. Blue and red dots indicate significantly down- and up-regulated genes,**  
 8 **respectively. (C) Heatmap showing the transcriptome profiles of PrL in Sham and**  
 9 **SNI mice. (D) Bubble plot of down-regulated genes-enriched biological process**  
 10 **in GO analysis. (E) TNF- $\alpha$  levels in the PrL at one and three weeks after surgery.**  
 11 **n = 7 mice per group for 1W, n = 8 mice per group for 3W. (F) Schematic of**

1 electrophysiological recordings of PrL<sup>BLA</sup> neurons. Rec, record. **(G)** Unchanged  
2 RMP of PrL<sup>BLA</sup> neurons in mice with TNF- $\alpha$  injection into PrL. n = 12 neurons  
3 from 3 mice per group. **(H)** Unchanged input resistance of PrL<sup>BLA</sup> neurons in mice  
4 with TNF- $\alpha$  injection into PrL. n = 12 neurons from 3 mice per group. Data were  
5 shown as mean  $\pm$  SEM. \* $p < 0.05$ ; ns, no significant difference. Student's t test **(E,**  
6 **G, H)**.



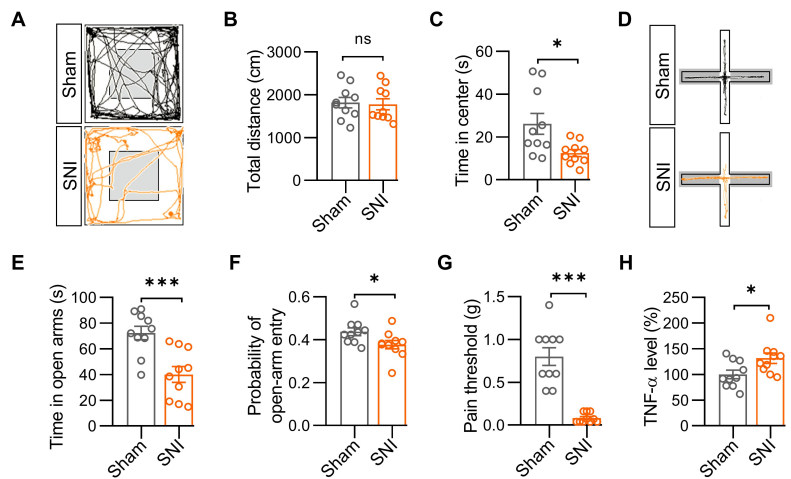

1

2 **Supplemental Figure 9 TNF- $\alpha$  level is increased in the PrL of female SNI**3 **mice. (A)** Representative traces of female mice travel in OFT. **(B)** Unchanged4 total distance that female mice traveled in OFT. n = 10 mice per group. **(C)**

5 Reduced time in the center of female mice two weeks after SNI surgery. n = 10

6 mice per group. **(D)** Representative traces of female mice travel in EPM. **(E)**

7 Reduced time in the open arms two weeks after SNI surgery. n = 10 mice per

8 group. **(F)** Reduced probability of open-arms entry two weeks after SNI surgery.9 n = 10 mice per group. **(G)** Decreased mechanical pain threshold in female SNI10 mice at two weeks after surgery. n = 10 mice per group. **(H)** Increased TNF- $\alpha$ 

11 level in the PrL of SNI female mice at two weeks after surgery. n = 10 mice per

12 group. Data were shown as mean  $\pm$  SEM. \* $p$  < 0.05; \*\*\* $p$  < 0.001; ns, no13 significant difference. Student's  $t$  test **(B, C, E, F, G, H)**.

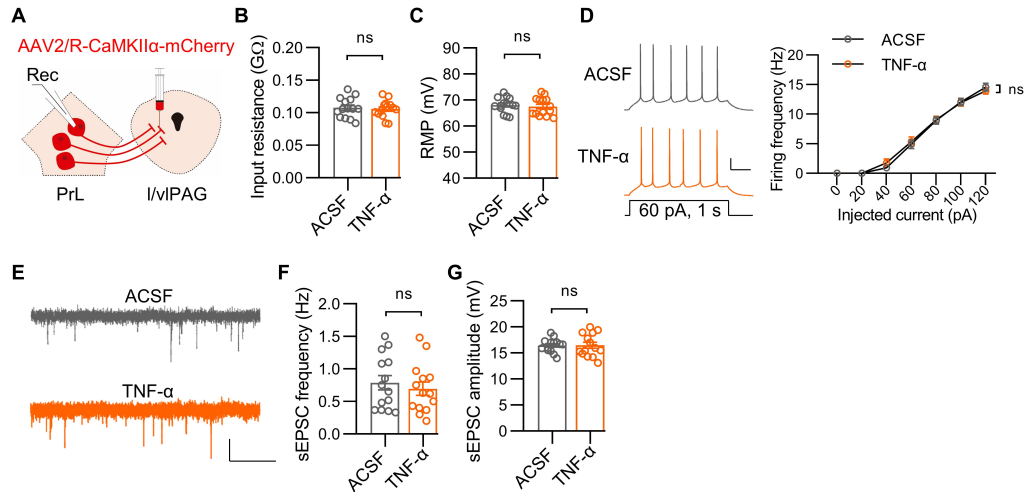

1

2 **Supplemental Figure 10 Characterization of the effect of TNF- $\alpha$  on PrL<sup>I/vIPAG</sup>**

3 **neurons. (A)** Schematic showing viral injection into the I/vIPAG and recording of

4 PrL<sup>I/vIPAG</sup> neurons. Rec, record. **(B)** Unchanged input resistance of PrL<sup>I/vIPAG</sup>

5 neurons in mice with TNF- $\alpha$  injection into PrL. n = 14 neurons from 3 mice per

6 group. **(C)** Unchanged RMP of PrL<sup>I/vIPAG</sup> neurons in mice with TNF- $\alpha$  injection into

7 PrL. n = 12 neurons from 3 mice per group. **(D)** Comparable firing frequencies of

8 PrL<sup>I/vIPAG</sup> neurons in response to current injections. Left, representative firing

9 traces. Scale bars, 200 ms and 20 mV. Right, quantitative data. n = 14 neurons

10 from 3 mice per group. **(E)** Representative sEPSC traces. Scale bars, 2 s and 10

11 pA. **(F)** Comparable sEPSC frequency of PrL<sup>I/vIPAG</sup> neurons in mice with TNF- $\alpha$

12 injection into PrL. n = 14 neurons from 3 mice per group. **(G)** Comparable sEPSC

13 amplitude of PrL<sup>I/vIPAG</sup> neurons in mice with TNF- $\alpha$  injection into PrL. n = 14

14 neurons from 3 mice per group. Data were shown as mean  $\pm$  SEM. ns, no

15 significant difference. Student's *t* test **(B, C, G)**; Two-way repeated-measures

16 ANOVA **(D)**; Mann-Whitney U test **(F)**.

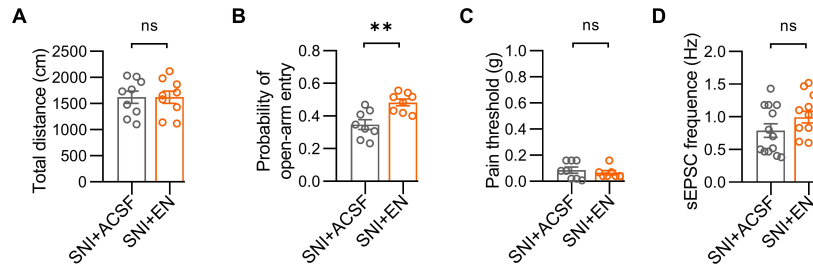

1

2 **Supplemental Figure 11 Characterization of the effects of EN in chronic**

3 **pain. (A)** Unaltered total distance in OFT in mice with EN infusion into PrL. n = 9

4 mice per group. **(B)** Increased probability of open-arm entry in EPM in mice with

5 EN infusion into PrL. n = 8 mice per group. **(C)** Not changed pain threshold by

6 EN infusion in SNI mice. n = 8 mice for ACSF group, n = 7 mice for EN group. **(D)**

7 Unaltered sEPSC frequency of PrL<sup>BLA</sup> neurons in SNI mice with EN infusion into

8 PrL. n = 13 neurons from 4 mice per group. Data were shown as mean ± SEM.

9 \*\**p* < 0.01; ns, no significant difference. Student's *t* test **(A, B, D)**; Mann-Whitney

10 U test **(C)**.

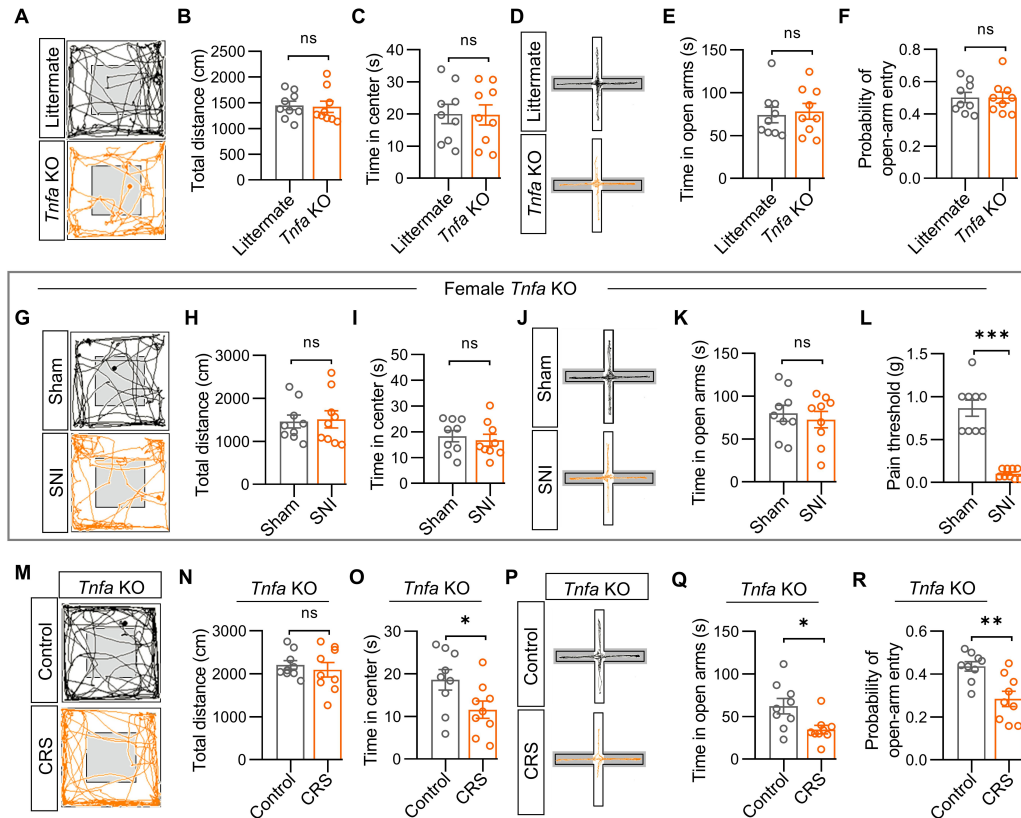

1

2 **Supplemental Figure 12 Characterization of the effects of *Tnfa* deletion on**  
 3 **anxiety-like behaviors. (A, D) Representative traces of mice travel in OFT (A)**  
 4 **and in EPM (D). (B, C) Unchanged distance (B) and time in center (C) in OFT**  
 5 **between *Tnfa* KO mice and their littermates. n = 9 mice per group. (E, F) Similar**  
 6 **time in open arms (E) and probability of open-arm entry (F) between *Tnfa* KO**  
 7 **mice and their littermates. n = 9 mice per group. (G, J) Representative traces of**  
 8 **female *Tnfa* KO mice travel in OFT (G) and in EPM (J). (H, I) Unchanged**  
 9 **distance (H) and time in center (I) in female *Tnfa* KO mice. n = 9 mice per group.**  
 10 **(K) Unchanged time in the open arms in female *Tnfa* KO mice. n = 9 mice per**  
 11 **group. (L) Decreased mechanical pain threshold in female *Tnfa* KO mice. n = 9**  
 12 **mice per group. (M, P) Representative travel traces of *Tnfa* KO mice in OFT (M)**  
 13 **and in EPM (P) after CRS training. (N) Unchanged distance between CRS-**

1 treated *Tnfa* KO mice and control *Tnfa* KO mice in OFT. n = 9 mice per group. (O)  
2 Decreased time in center between CRS-treated *Tnfa* KO mice and control *Tnfa*  
3 KO mice in OFT. n = 9 mice per group. (Q) Decreased time in open arms  
4 between CRS-treated *Tnfa* KO mice and control *Tnfa* KO mice in EPM. n = 9  
5 mice per group. (R) Decreased probability of open-arm entry between CRS-  
6 treated *Tnfa* KO mice and control *Tnfa* KO mice in EPM. n = 9 mice per group.  
7 Data were shown as mean  $\pm$  SEM. \* $p < 0.05$ ; \*\* $p < 0.01$ ; \*\*\* $p < 0.001$ ; ns, no  
8 significant difference. Student's *t* test (B, C, E, F, H, I, K, N, O, Q, R); Mann-  
9 Whitney U test (L).

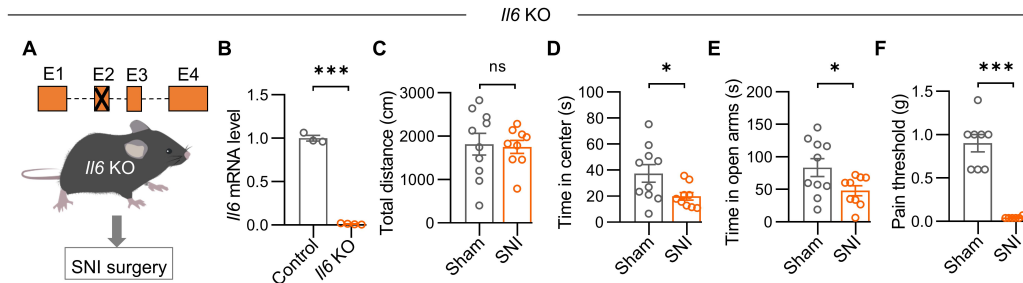

1

2 **Supplemental Figure 13 Characterization of the effects of *I/6* deletion in**

3 **chronic pain. (A) Schematic of *I/6* null (KO) mice which were subjected to SNI**

4 **surgery. E, exon. (B) Undetectable *I/6* mRNA level in the PrL of *I/6* KO mice. n =**

5 **3 control mice, n = 4 *I/6* KO mice. (C) Unchanged total distance in OFT between**

6 **Sham and SNI *I/6* KO mice. n = 10 and 9 mice for Sham and SNI groups, respectively.**

7 **(D) Decreased time in center in OFT in SNI *I/6* KO mice. n = 10 and**

8 **9 mice for Sham and SNI groups, respectively. (E) Decreased time in open arms**

9 **in EPM in SNI *I/6* KO mice. n = 10 and 9 mice for Sham and SNI groups,**

10 **respectively. (F) Little effect of *I/6* deletion on pain threshold in SNI mice. n = 10**

11 **and 9 mice for Sham and SNI groups, respectively. Data were shown as mean ±**

12 **SEM. \* $p < 0.05$ ; \*\*\* $p < 0.001$ ; ns, no significant difference. Student's *t* test (B, C,**

13 **D, E); Mann-Whitney U test (F).**

14

15

16 **Video 1 Ca<sup>2+</sup> dynamics of PrL<sup>BLA</sup> neurons in sham mice.**

17 **Video 2 Ca<sup>2+</sup> dynamics of PrL<sup>I/VPAG</sup> neurons in sham mice.**

18 **Video 3 Ca<sup>2+</sup> dynamics of PrL<sup>BLA</sup> neurons in SNI mice.**

19 **Video 4 Ca<sup>2+</sup> dynamics of PrL<sup>I/VPAG</sup> neurons in SNI mice.**

1 **Statistical results**

2

3 **Figure 1**

4 **(E)** Two-way repeated measures ANOVA followed by post-hoc Sidak's test,  
5 group effect,  $F_{(1,18)} = 117.2$ ,  $p < 0.0001$ . For 1W,  $t = 9.882$ ,  $DF = 36$ ,  $p < 0.0001$ ;  
6 for 2W,  $t = 9.36$ ,  $DF = 36$ ,  $p < 0.0001$ . Time effect,  $F_{(1,18)} = 2.729$ ,  $p = 0.1159$ ;  
7 interaction effect,  $F_{(1,18)} = 0.3239$ ,  $p = 0.5763$ .

8 **(G)** Two-way repeated measures ANOVA followed by post-hoc Sidak's test,  
9 group effect,  $F_{(1,14)} = 7.232$ ,  $p = 0.0176$ . For 1W,  $t = 0.338$ ,  $DF = 28$ ,  $p = 0.9313$ ;  
10 for 2W,  $t = 3.245$ ,  $DF = 28$ ,  $p = 0.0061$ . Time effect,  $F_{(1,14)} = 4.13$ ,  $p = 0.0615$ ;  
11 interaction effect,  $F_{(1,14)} = 3.798$ ,  $p = 0.0716$ .

12 **(I)** Two-way repeated measures ANOVA followed by post-hoc Sidak's test, group  
13 effect,  $F_{(1,14)} = 4.286$ ,  $p = 0.0574$ . For 1W,  $t = 0.4734$ ,  $DF = 28$ ,  $p = 0.8701$ ; for  
14 2W,  $t = 2.859$ ,  $DF = 28$ ,  $p = 0.0158$ . Time effect,  $F_{(1,14)} = 0.0879$ ,  $p = 0.7712$ ;  
15 interaction effect,  $F_{(1,14)} = 4.157$ ,  $p = 0.0608$ .

16 **(L, M)** Friedman test with post-hoc Dunn's test, for integrated somatic  $Ca^{2+}$   
17 activity,  $p < 0.0001$ . BL vs 1W,  $p = 0.0567$ ; BL vs 2W,  $p < 0.0001$ ; 1W vs 2W,  $p =$   
18  $0.0197$ . For peak amplitude of  $Ca^{2+}$  transients,  $p = 0.0002$ . BL vs 1W,  $p = 0.4144$ ;  
19 BL vs 2W,  $p = 0.0001$ ; 1W vs 2W,  $p = 0.0284$ .

20 **(O, P)** Friedman test with post-hoc Dunn's test, for integrated somatic  $Ca^{2+}$   
21 activity,  $p < 0.0001$ . BL vs 1W,  $p = 0.0309$ ; BL vs 2W,  $p < 0.0001$ ; 1W vs 2W,  $p =$   
22  $0.0948$ . For peak amplitude of  $Ca^{2+}$  transients,  $p < 0.0001$ . BL vs 1W,  $p = 0.0457$ ;  
23 BL vs 2W,  $p < 0.0001$ ; 1W vs 2W,  $p = 0.0795$ .

1

2 **Figure 2**

3 (C) Repeated one-way ANOVA, for Sham+mcherry,  $F_{(2,12)} = 1.5$ ,  $p = 0.2621$ ; for  
4 Sham+ChR2,  $F_{(2,12)} = 0.5912$ ,  $p = 0.569$ ; Friedman test, for SNI+mcherry,  $p =$   
5  $0.8724$ ; for SNI+ChR2,  $p = 0.1111$ .

6 (D) Repeated one-way ANOVA followed by post-hoc Turkey's test. For  
7 Sham+mcherry,  $F_{(2,12)} = 0.7855$ ,  $p = 0.478$ ; for Sham+ChR2,  $F_{(2,12)} = 0.0202$ ,  $p =$   
8  $0.9801$ ; for SNI+mcherry,  $F_{(2,16)} = 0.3403$ ,  $p = 0.7166$ ; for SNI+ChR2,  $F_{(2,16)} =$   
9  $8.519$ ,  $p = 0.003$ . Pre vs Light,  $p = 0.0032$ ; Post vs Light,  $p = 0.0197$ .

10 (E) Repeated one-way ANOVA followed by post-hoc Turkey's test. For  
11 Sham+mcherry,  $F_{(2,12)} = 0.5253$ ,  $p = 0.6044$ ; for Sham+ChR2,  $F_{(2,14)} = 0.0473$ ,  $p =$   
12  $0.9539$ ; for SNI+mcherry,  $F_{(2,16)} = 0.442$ ,  $p = 0.6503$ ; for SNI+ChR2,  $F_{(2,16)} = 9.63$ ,  
13  $p = 0.0018$ . Light vs Pre,  $p = 0.0013$ ; Post vs Light,  $p = 0.0465$ .

14 (G) Repeated one-way ANOVA, for Sham+mcherry,  $F_{(2,10)} = 0.0336$ ,  $p = 0.9671$ ;  
15 for Sham+ChR2,  $F_{(2,10)} = 0.2088$ ,  $p = 0.815$ . Friedman test, for SNI+mcherry,  $p =$   
16  $0.3786$ ; for SNI+ChR2,  $p = 0.2222$ .

17 (H) Repeated one-way ANOVA followed by post-hoc Turkey's test. For  
18 Sham+mcherry,  $F_{(2,12)} = 0.0555$ ,  $p = 0.9462$ ; for Sham+ChR2,  $F_{(2,12)} = 0.1458$ ,  $p =$   
19  $0.8659$ ; for SNI+mcherry,  $F_{(2,12)} = 0.1952$ ,  $p = 0.8253$ ; for SNI+ChR2,  $F_{(2,12)} =$   
20  $8.959$ ,  $p = 0.0042$ . Pre vs Light,  $p = 0.0095$ ; Post vs Light,  $p = 0.0075$ .

21 (I) Repeated one-way ANOVA, for Sham+mcherry,  $F_{(2,12)} = 0.8546$ ,  $p = 0.4498$ ;  
22 for Sham+ChR2,  $F_{(2,12)} = 0.6905$ ,  $p = 0.5202$ . Friedman test, for SNI+mcherry,  $p$



1 = 0.6197; for SNI+ChR2,  $p = 0.0012$ . Light vs Pre,  $p = 0.0485$ ; Post vs Light,  $p =$   
2 0.004.

3

#### 4 **Figure 3**

5 **(C)** Friedman test followed by post-hoc Dunn's test, for Sham+mcherry,  $p =$   
6 0.321; for Sham+ChR2,  $p = 0.0247$ , Pre vs Light,  $p = 0.1351$ ; Post vs Light,  $p >$   
7 0.9999; for SNI+mcherry,  $p > 0.9999$ ; for Sham+ChR2,  $p = 0.0005$ , Pre vs Light,  
8  $p = 0.004$ , Post vs Light,  $p = 0.0485$ .

9 **(D)** Friedman test, for Sham+mcherry,  $p = 0.3046$ ; for SNI+mcherry,  $p = 0.5023$ ;  
10 for Sham+ChR2,  $p = 0.6197$ . Repeated one-way ANOVA, for Sham+ChR2,  $F_{(2,12)}$   
11  $= 0.1408$ ,  $p = 0.7738$ .

12 **(F)** Friedman test followed by post-hoc Dunn's test, for Sham+mcherry,  $p =$   
13 0.2387; for Sham+NpHR,  $p = 0.0009$ , Pre vs Light,  $p = 0.0063$ , Post vs Light,  $p =$   
14 0.0334; for SNI+mcherry,  $p > 0.9999$ ; for SNI+ChR2,  $p = 0.0055$ , Pre vs Light,  $p$   
15  $= 0.0693$ , Post vs Light,  $p = 0.0334$ .

16 **(G)** Repeated one-way ANOVA. For Sham+mcherry,  $F_{(2,12)} = 1.376$ ,  $p = 0.2896$ ;  
17 for Sham+ChR2,  $F_{(2,12)} = 0.5011$ ,  $p = 0.618$ ; for SNI+mcherry,  $F_{(2,12)} = 1.078$ ,  $p =$   
18 0.3711; for SNI+ChR2,  $F_{(2,12)} = 0.0352$ ,  $p = 0.9655$ .

19

#### 20 **Figure 4**

21 **(B)** Mann-Whitney U test,  $p = 0.6209$ .

22 **(C)** Student's t test,  $t_{(27)} = 0.1021$ ,  $p = 0.9194$ .

1 (D) Two-way repeated-measures ANOVA, for group effect,  $F_{(1,44)} = 10.68$ ,  $p =$   
2 0.0021; for current effect,  $F_{(6,264)} = 437.2$ ,  $p < 0.0001$ ; for interaction,  $F_{(6,264)} =$   
3 3.102,  $p = 0.0059$ .

4 (F) Student's  $t$  test,  $t_{(28)} = 0.2996$ ,  $p = 0.7667$ .

5 (G) Mann-Whitney U test,  $p = 0.0002$ .

6 (I) Mann-Whitney U test,  $p = 0.8578$ .

7 (J) Student's  $t$  test,  $t_{(33)} = 0.4512$ ,  $p = 0.6548$ .

8

9 **Figure 5**

10 (B) Student's  $t$  test,  $t_{(22)} = 1.016$ ,  $p = 0.3205$ .

11 (C) Student's  $t$  test,  $t_{(22)} = 0.2446$ ,  $p = 0.8091$ .

12 (D) Two-way repeated-measures ANOVA, for group effect,  $F_{(1,22)} = 27.0$ ,  $p <$   
13 0.0001; for current effect,  $F_{(6,132)} = 556.7$ ,  $p < 0.0001$ ; for interaction,  $F_{(6,132)} =$   
14 13.76,  $p < 0.0001$ .

15 (F) Student's  $t$  test,  $t_{(28)} = 0.127$ ,  $p = 0.8999$ .

16 (G) Student's  $t$  test,  $t_{(28)} = 1.812$ ,  $p = 0.0807$ .

17 (I) Student's  $t$  test,  $t_{(32)} = 5.623$ ,  $p < 0.0001$ .

18 (J) Student's  $t$  test,  $t_{(32)} = 1.935$ ,  $p = 0.0619$ .

19

20 **Figure 6**

21 (B) For NMDAR-mediated currents, student's  $t$  test,  $t_{(32)} = 0.23$ ,  $p = 0.8196$ ; for  
22 AMPAR-mediated currents, Mann-Whitney U test,  $p = 0.0007$ .

23 (D) Student's  $t$  test,  $t_{(17)} = 2.345$ ,  $p = 0.0314$ .

1 (E) Mann-Whitney U test,  $p = 0.2775$ .

2 (G) Student's  $t$  test, for GluA1,  $t_{(8)} = 8.163$ ,  $p < 0.001$ ; for GluA2,  $t_{(8)} = 1.333$ ,  $p =$   
3  $0.2193$ ; for GluN1,  $t_{(8)} = 0.9311$ ,  $p = 0.379$ .

4

## 5 **Figure 7**

6 (E) One-way ANOVA followed by post-hoc Turkey's test,  $F_{(3,8)} = 22.07$ ,  $p =$   
7  $0.0003$ . Control+sham vs GluA1-c+sham,  $p = 0.8433$ ; Control+sham vs  
8 Control+SNI,  $p = 0.0016$ ; Control+SNI vs GluA1-c+SNI,  $p = 0.0005$ ; GluA1-  
9 c+sham vs GluA1-c+SNI,  $p = 0.9857$ .

10 (H) Kruskal-Wallis test,  $p = 0.5452$ .

11 (I) Kruskal-Wallis test followed by post-hoc Dunn's test,  $p < 0.0001$ .  
12 Control+sham vs GluA1-ct+sham,  $p > 0.999$ ; Control+sham vs Control+SNI,  $p =$   
13  $0.0002$ ; Control+SNI vs GluA1-ct+SNI,  $p = 0.0076$ ; GluA1-ct+sham vs GluA1-  
14 ct+SNI,  $p > 0.999$ .

15 (K) Kruskal-Wallis test followed by post-hoc Dunn's test,  $p = 0.0015$ .  
16 Control+sham vs GluA1-ct+sham,  $p > 0.999$ ; Control+sham vs Control+SNI,  $p =$   
17  $0.0091$ ; Control+SNI vs GluA1-ct+SNI,  $p = 0.0076$ ; GluA1-ct+sham vs GluA1-  
18 ct+SNI,  $p > 0.999$ .

19 (M) One-way ANOVA followed by post-hoc Turkey's test,  $F_{(3,28)} = 6.557$ ,  $p =$   
20  $0.0017$ . Control+sham vs GluA1-ct+sham,  $p = 0.9681$ ; Control+sham vs  
21 Control+SNI,  $p = 0.0095$ ; Control+SNI vs GluA1-ct+SNI,  $p = 0.0087$ ; GluA1-  
22 ct+sham vs GluA1-ct+SNI,  $p = 0.9752$ .

23

1 **Figure 8**

2 (C) Student's *t* test, for TNF- $\alpha$ ,  $t_{(10)} = 3.345$ ,  $p = 0.0074$ ; for IL-1 $\beta$ ,  $t_{(10)} = 0.168$ ,  $p =$   
3  $0.87$ ; for IL-10,  $t_{(10)} = 1.191$ ,  $p = 0.261$ ; for IL-6,  $t_{(10)} = 0.3713$ ,  $p = 0.7182$ .

4 (E) Mann-Whitney U test,  $p = 0.9782$ .

5 (G) Student's *t* test,  $t_{(14)} = 4.882$ ,  $p = 0.0002$ .

6 (I) Student's *t* test,  $t_{(14)} = 5.656$ ,  $p < 0.0001$ .

7 (J) Two-way repeated measures ANOVA, for group effect,  $F_{(1,22)} = 18.05$ ,  $p =$   
8  $0.0003$ ; for current effect,  $F_{(6,132)} = 585.2$ ,  $p < 0.0001$ ; for interaction,  $F_{(6,132)} = 7.22$ ,  
9  $p < 0.0001$ .

10 (L) Student's *t* test,  $t_{(27)} = 3.181$ ,  $p = 0.0037$ .

11 (M) Student's *t* test,  $t_{(27)} = 1.886$ ,  $p = 0.0701$ .

12

13 **Figure 9**

14 (C) Student's *t* test,  $t_{(16)} = 2.903$ ,  $p = 0.0104$ .

15 (E) Student's *t* test,  $t_{(14)} = 2.418$ ,  $p = 0.0298$ .

16 (G) Student's *t* test,  $t_{(28)} = 5.256$ ,  $p < 0.0001$ .

17 (H) Two-way repeated-measures ANOVA, for group effect,  $F_{(1,31)} = 19.75$ ,  $p =$   
18  $0.0001$ ; for current effect,  $F_{(6,186)} = 421.5$ ,  $p < 0.0001$ ; for interaction,  $F_{(6,186)} =$   
19  $15.19$ ,  $p < 0.0001$ .

20 (I) Student's *t* test,  $t_{(6)} = 5.128$ ,  $p = 0.0022$ .

21 (J) Mann-Whitney U test,  $p = 0.0006$ .

22 (L) Student's *t* test,  $t_{(13)} = 0.7935$ ,  $p = 0.4417$ .

23 (N) Student's *t* test,  $t_{(13)} = 0.3678$ ,  $p = 0.7189$ .

1 (P) Student's *t* test,  $t_{(24)} = 0.15$ ,  $p = 0.882$ .

2 (Q) Student's *t* test,  $t_{(24)} = 1.386$ ,  $p = 0.1784$ .

3 (R) Two-way repeated-measures ANOVA, for group effect,  $F_{(1,22)} = 2.56$ ,  $p =$   
4  $0.1239$ ; for current effect,  $F_{(6,132)} = 687.1$ ,  $p < 0.0001$ ; for interaction,  $F_{(6,132)} =$   
5  $0.9128$ ,  $p = 0.4879$ .

6

### 7 **Figure 10**

8 (A) Mann-Whitney U test,  $p < 0.0001$ .

9 (D) Student's *t* test,  $t_{(6)} = 3.181$ ,  $p = 0.0191$ .

10 (E) Kruskal-Wallis test followed by Dunn's test,  $p < 0.0001$ . For Control+sham vs  
11 *Tnfr1*-KD+sham,  $p > 0.999$ ; for *Tnfr1*-KD+sham vs *Tnfr1*-KD+SNI,  $p = 0.0088$ ; for  
12 Control+sham vs Control+SNI,  $p = 0.0002$ ; for Control+SNI vs *Tnfr1*-KD+SNI,  $p >$   
13  $0.999$ .

14 (G) Kruskal-Wallis test followed by Dunn's test,  $p = 0.0011$ . For Control+sham vs  
15 *Tnfr1*-KD+sham,  $p > 0.999$ ; for *Tnfr1*-KD+sham vs *Tnfr1*-KD+SNI,  $p > 0.9999$ ; for  
16 Control+sham vs Control+SNI,  $p = 0.0099$ ; for Control+SNI vs *Tnfr1*-KD+SNI,  $p =$   
17  $0.0035$ .

18 (I) One-way ANOVA followed by post-hoc Turkey's test,  $F_{(3,28)} = 5.731$ ,  $p =$   
19  $0.0035$ . Control+sham vs *Tnfr1*-KD+sham,  $p = 0.9961$ ; Control+sham vs  
20 Control+SNI,  $p = 0.0054$ ; Control+SNI vs *Tnfr1*-KD+SNI,  $p = 0.0377$ ; *Tnfr1*-  
21 KD+sham vs *Tnfr1*-KD+SNI,  $p = 0.9372$ .

22 (K) Kruskal-Wallis test followed by Dunn's test,  $p < 0.0001$ . Control+sham vs  
23 *Tnfr1*-KD+sham,  $p > 0.999$ ; Control+sham vs Control+SNI,  $p < 0.0001$ ;

1 Control+SNI vs *Tnfr1*-KD+SNI,  $p = 0.0162$ ; *Tnfr1*-KD+sham vs *Tnfr1*-KD+SNI,  
2  $p > 0.999$ .

3 (L) Two-way repeated-measures ANOVA, For Control+sham vs. Control+SNI,  
4 group effect,  $F_{(1,28)} = 69.68$ ,  $p < 0.0001$ ; current effect,  $F_{(6,168)} = 635.8$ ,  $p < 0.0001$ ;  
5 interaction,  $F_{(6,168)} = 27.35$ ,  $p < 0.0001$ . For *Tnfr1*-KD+sham vs. *Tnfr1*-KD+SNI,  
6 group effect,  $F_{(1,28)} = 0.939$ ,  $p = 0.3408$ ; current effect,  $F_{(6,168)} = 338.7$ ,  $p < 0.0001$ ;  
7 interaction,  $F_{(6,168)} = 1.01$ ,  $p = 0.4208$ .

8

9

#### 10 **Supplemental Figure 1**

11 (H) Two-way repeated measures ANOVA, group effect,  $F_{(1,14)} = 0.1215$ ,  $p =$   
12  $0.7326$ ; time effect,  $F_{(1,14)} = 3.858$ ,  $p = 0.0697$ ; interaction effect,  $F_{(1,14)} = 0.307$ ,  $p$   
13  $= 0.5883$ .

14 (I) Two-way repeated measures ANOVA followed by post-hoc Sidak's test, group  
15 effect,  $F_{(1,14)} = 5.708$ ,  $p = 0.0315$ . For 1W,  $p = 0.8898$ ; for 2W,  $p = 0.0119$ . Time  
16 effect,  $F_{(1,14)} = 0.6684$ ,  $p = 0.4273$ ; interaction effect,  $F_{(1,14)} = 3.298$ ,  $p = 0.0908$ .

17

#### 18 **Supplemental Figure 2**

19 (F) Friedman test, for somatic  $\text{Ca}^{2+}$  activity,  $p = 0.0625$ ; for peak amplitude of  
20  $\text{Ca}^{2+}$  transients,  $p = 0.1251$ .

21 (H) Friedman test, for somatic  $\text{Ca}^{2+}$  activity,  $p = 0.2674$ . For peak amplitude of  
22  $\text{Ca}^{2+}$  transients,  $p = 0.1283$ .

23

1 **Supplemental Figure 3**

2 (H) Repeated one-way ANOVA followed by post-hoc Turkey's test,  $F_{(2,6)} = 20.06$ ,  
3  $p = 0.0022$ ; Control vs TTX,  $p = 0.0019$ ; TTX vs TTX+4-AP,  $p = 0.0169$ .

4

5 **Supplemental Figure 4**

6 (G) Repeated one-way ANOVA followed by post-hoc Turkey's test,  $F_{(2,22)} = 16.28$ ,  
7  $p < 0.0001$ ; Pre vs Light,  $p = 0.0009$ ; Light vs Post,  $p < 0.0001$ .

8 (H) Repeated one-way ANOVA,  $F_{(2,22)} = 1.47$ ,  $p = 0.2516$ .

9 (J) Repeated one-way ANOVA,  $F_{(2,26)} = 1.728$ ,  $p = 0.1974$ .

10 (K) Repeated one-way ANOVA,  $F_{(2,26)} = 1.416$ ,  $p = 0.2608$ .

11 (M) Repeated one-way ANOVA,  $F_{(2,8)} = 2.357$ ,  $p = 0.1568$ .

12 (N) Friedman test,  $p = 0.9537$ .

13

14 **Supplemental Figure 5**

15 (D) Student's  $t$  test,  $t_{(8)} = 2.485$ ,  $p = 0.0378$ .

16 (E) Student's  $t$  test,  $t_{(60)} = 2.925$ ,  $p = 0.0049$ .

17 (F) Student's  $t$  test,  $t_{(60)} = 2.733$ ,  $p = 0.0082$ .

18 (H) Student's  $t$  test,  $t_{(8)} = 7.261$ ,  $p < 0.0001$ .

19 (I) Mann-Whitney U test,  $p = 0.0232$ .

20 (J) Mann-Whitney U test,  $p = 0.0038$ .

21

22 **Supplemental Figure 6**

1 (D) Repeated one-way ANOVA followed by post-hoc Turkey's test,  $F_{(2,8)} = 18.17$ ,  
2  $p = 0.0011$ ; Control vs TTX,  $p = 0.0017$ ; TTX vs TTX+4-AP,  $p = 0.0024$ .

3

#### 4 **Supplemental Figure 7**

5 (A) Two-way repeated-measures ANOVA, for group effect,  $F_{(1,21)} = 0.6853$ ,  $p =$   
6  $0.4171$ ; for current effect,  $F_{(6,126)} = 722.3$ ,  $p < 0.0001$ ; for interaction,  $F_{(6,126)} =$   
7  $0.7535$ ,  $p = 0.6078$ .

8 (B) Two-way repeated measures ANOVA, group effect,  $F_{(1,40)} = 0.0893$ ,  $p =$   
9  $0.7666$ ; interval effect,  $F_{(3,120)} = 6.986$ ,  $p = 0.0002$ ; interaction effect,  $F_{(3,120)} =$   
10  $0.4172$ ,  $p = 0.741$ .

11 (D) For GluN2A, Student's  $t$  test,  $t_{(8)} = 0.9311$ ,  $p = 0.379$ ; for GluN2B, Mann-  
12 Whitney U test,  $p = 0.8413$ ; for PSD95, student's  $t$  test,  $t_{(8)} = 0.7162$ ,  $p = 0.4943$ .

13 (E) One-way ANOVA,  $F_{(3,36)} = 0.7398$ ,  $p = 0.5353$ .

14 (F) One-way ANOVA,  $F_{(3,36)} = 0.2665$ ,  $p = 0.8491$ .

15 (H) Two-way repeated-measures ANOVA, For Control+sham vs. Control+SNI,  
16 group effect,  $F_{(1,18)} = 34.25$ ,  $p < 0.0001$ ; current effect,  $F_{(6,108)} = 565.6$ ,  $p < 0.0001$ ;  
17 interaction,  $F_{(6,108)} = 15.98$ ,  $p < 0.0001$ . For GluA1-ct+sham vs. GluA1-ct+SNI,  
18 group effect,  $F_{(1,18)} = 0.0296$ ,  $p = 0.8654$ ; current effect,  $F_{(6,108)} = 508.6$ ,  $p <$   
19  $0.0001$ ; interaction,  $F_{(6,108)} = 0.9876$ ,  $p = 0.4374$ .

20 (I) One-way ANOVA,  $F_{(3,28)} = 0.2001$ ,  $p = 0.8954$ .

21 (J) One-way ANOVA followed by post-hot Turkey's test,  $F_{(3,28)} = 5.814$ ,  $p =$   
22  $0.0032$ . Control+Sham vs GluA1-ct+Sham,  $p = 0.8916$ ; Control+Sham vs



1 Control+SNI,  $p = 0.005$ ; Control+SNI vs GluA1-ct+SNI,  $p = 0.0102$ ; GluA1-  
2 ct+Sham vs GluA1-ct+SNI,  $p = 0.9737$ .

3

#### 4 **Supplemental Figure 8**

5 (E) Student's  $t$  test, for 1w,  $t_{(12)} = 0.5487$ ,  $p = 0.5932$ ; for 3w,  $t_{(14)} = 2.599$ ,  $p =$   
6 0.021.

7 (G) Student's  $t$  test,  $t_{(22)} = 1.462$ ,  $p = 0.1579$ .

8 (H) Student's  $t$  test,  $t_{(22)} = 0.3732$ ,  $p = 0.7126$ .

9

#### 10 **Supplemental Figure 9**

11 (B) Student's  $t$  test,  $t_{(18)} = 0.2206$ ,  $p = 0.8279$ .

12 (C) Student's  $t$  test,  $t_{(18)} = 2.652$ ,  $p = 0.0162$ .

13 (E) Student's  $t$  test,  $t_{(18)} = 3.985$ ,  $p = 0.0009$ .

14 (F) Student's  $t$  test,  $t_{(18)} = 2.266$ ,  $p = 0.036$ .

15 (G) Student's  $t$  test,  $t_{(18)} = 6.855$ ,  $p < 0.0001$ .

16 (H) Student's  $t$  test,  $t_{(18)} = 2.394$ ,  $p = 0.0278$ .

17

#### 18 **Supplemental Figure 10**

19 (B) Student's  $t$  test,  $t_{(26)} = 0.4011$ ,  $p = 0.6917$ .

20 (C) Student's  $t$  test,  $t_{(26)} = 0.4897$ ,  $p = 0.6284$ .

21 (D) Two-way repeated-measures ANOVA, for group effect,  $F_{(1,26)} = 0.0264$ ,  $p =$   
22 0.8723; for current effect,  $F_{(6,156)} = 513.4$ ,  $p < 0.0001$ ; for interaction,  $F_{(6,156)} =$   
23 0.813,  $p = 0.5613$ .

- 1 (F) Mann-Whitney U test,  $p = 0.6264$ .  
2 (G) Student's  $t$  test,  $t_{(26)} = 0.0318$ ,  $p = 0.9747$ .

3

4 **Supplemental Figure 11**

- 5 (A) Student's  $t$  test,  $t_{(16)} = 0.0035$ ,  $p = 0.9972$ .  
6 (B) Student's  $t$  test,  $t_{(14)} = 3.722$ ,  $p = 0.0023$ .  
7 (C) Mann-Whitney U test,  $p = 0.7374$ .  
8 (D) Student's  $t$  test,  $t_{(24)} = 1.509$ ,  $p = 0.1444$ .

9

10 **Supplemental Figure 12**

- 11 (B) Student's  $t$  test,  $t_{(16)} = 0.1964$ ,  $p = 0.8467$ .  
12 (C) Student's  $t$  test,  $t_{(16)} = 0.0649$ ,  $p = 0.949$ .  
13 (E) Student's  $t$  test,  $t_{(16)} = 0.3241$ ,  $p = 0.75$ .  
14 (F) Student's  $t$  test,  $t_{(16)} = 0.0094$ ,  $p = 0.9926$ .  
15 (H) Student's  $t$  test,  $t_{(16)} = 0.2012$ ,  $p = 0.8431$ .  
16 (I) Student's  $t$  test,  $t_{(16)} = 0.514$ ,  $p = 0.6143$ .  
17 (K) Student's  $t$  test,  $t_{(16)} = 0.5447$ ,  $p = 0.5935$ .  
18 (L) Mann-Whitney U test,  $p < 0.0001$ .  
19 (N) Student's  $t$  test,  $t_{(16)} = 0.575$ ,  $p = 0.5733$ .  
20 (O) Student's  $t$  test,  $t_{(16)} = 2.231$ ,  $p = 0.0404$ .  
21 (Q) Student's  $t$  test,  $t_{(16)} = 2.681$ ,  $p = 0.0164$ .  
22 (R) Student's  $t$  test,  $t_{(16)} = 3.599$ ,  $p = 0.0024$ .

23

1 **Supplemental Figure 13**

2 **(B)** Student's  $t$  test,  $t_{(5)} = 35.76$ ,  $p < 0.0001$ .

3 **(C)** Student's  $t$  test,  $t_{(17)} = 0.2048$ ,  $p = 0.8401$ .

4 **(D)** Student's  $t$  test,  $t_{(17)} = 2.279$ ,  $p = 0.0359$ .

5 **(E)** Student's  $t$  test,  $t_{(17)} = 2.203$ ,  $p = 0.0417$ .

6 **(F)** Mann-Whitney U test,  $p = 0.0002$ .
